# Supplementary material
Source: publisher figshare collection journal article supplement (https://acs.figshare.com/ndownloader/files/14601995)
Supplement: Supplementary file 1 [file 14601995]

## Sheet: Structure
Uncertainty implications of hybrid approach in LCA: precision versus accuracy
SUPPLEMENTAL INFORMATION
Jessica Perkins and Sangwon Suh*
Bren School of Environmental Science and Management, University of California, Santa Barbara, California, 93106, United States;
*Corresponding Author: Sangwon Suh; Tel: +1-805-893-7185; Fax: +1-805-893-7612; email: suh@bren.ucsb.edu.
The equations in the main text accurately depict the mathmetical computations used in this study; however, to reduce computation time and due to data availability, the LCI for ecoinvent and C x LCI for CEDA were used in the actual calculations (along with their uncertainty characterizations). Additionally, the overall A matrix used in the actual calculations did not directly include the full ecoi…
A_mistra	The technology matrix inputs from the Mistra study itself
B_mistra	The environmental exchanges associated with processes described in the Mistra study
A_u_ecoinvent	The processes for which ecoinvent data was available and utilized
LCI_ecoinvent	The life cycle inventory emissions associated with the Ecoinvent processes utilized
LCI_ecoinvent_var	The GSD values associated with the parameters in LCI_ecoinvent
A_u_IO	The upstream processes included in the hybridization based on the average contribution of each commodity to the five jacket-production-related sectors in CEDA
A_u_IO_var	The uncertainty (standard deviation) associated with the monetary values based on the five-sector average in Cu_IO
CxLCI_CEDA	The characterized life cycle inventory emissions associated with the CEDA monetary flows utilized
CxLCI_CEDA_var	The GSD values associated with the parameters in CxLCI_CEDA_var
A	see the mathematical setup on the right for A*
Avar	see the mathematical setup on the right for Avar
B	see the mathematical setup on the right for B*
Bvar	see the mathematical setup on the right for Bvar
C	see the mathematical setup on the right for C*
y	see the mathematical setup on the right for y* (the functional unit is "use of 1 jacket")

## Sheet: A_mistra
	2-methyl-4-isothiazolin-3-one	5-chloro-2-methyl-4-isothiazoline-3-one	Acid (formic acid), average	Air emissions from 1 kg Acid (formic acid), average	Air emissions from 1 kg Detergent/Wetting agent, average	Air emissions from 1 kg Lubricant, average	Air emissions from 1 kg Sequestering agent, average	Alkyl ethoxylate	Antifoaming agent, average	Dimethyl siloxane, reaction product with silica	Sodium lauryl sulphate	Antireduction agent (H2O2), average	Base (alkali) (Na2CO3), average	Base (alkali) (NaOH), average	Black disperse dyestuff PA, BAT	Blue disperse dyestuff PA, BAT	Business trips for retail staff	Buttons, jacket	Carding for non woven process (CN)	Confectioning of jacket, per kg (mix)	MiFuFa electricity mix	Cotton thread, black 50 (mix)	Ring spinning to yarn, CO 300 dtex, average (mix)	Dyeing cotton/PES weave (mix)	Cotton, based on Cotton Inc. data in GaBi	Decalcifier ((NH4)2SO4), average	Detergent/Wetting agent, average	Oxirane, methyl-, polymer with oxirane, decyl ether	Polyacrylic acid, sodium salt	Sodium mono(2-ethylhexyl)estersulfate	Detergent/Wetting agent, BAT	Dispergent, average	Distribution & Retail of jacket	Transport of jacket to Sweden	Transport of jacket within Sweden	Electricity in the stores and offices	Transport of retail staff to stores	Packaging for jacket - store	District heating MiFuFa, Swedish average	Heat from waste, at municipal waste incineration plant with emissions	Dry spinning of elastane to fibres (mix)	Drying cotton/PES in stenter frame (mix)	Drying of jacket, LC	Drying PA6 in stenter frame (mix)	Dummy CaF2 (low radioactice)	Dummy Plutonium as residual product	Dummy Uranium depleted	DWR agent, average	Dyeing and drying PA6 weave black in beam dyeing machine, average (mix)
2-methyl-4-isothiazolin-3-one	0	0	0	0	0	0	0	0	0.001	0	0	0	0	0	0	0	0	0	0	0	0	0	0	0	0	0	0	0	0	0	0	0	0	0	0	0	0	0	0	0	0	0	0	0	0	0	0	0	0
5-chloro-2-methyl-4-isothiazoline-3-one	0	0	0	0	0	0	0	0	0.001	0	0	0	0	0	0	0	0	0	0	0	0	0	0	0	0	0	0	0	0	0	0	0	0	0	0	0	0	0	0	0	0	0	0	0	0	0	0	0	0
Acid (formic acid), average	0	0	0	0	0	0	0	0	0	0	0	0	0	0	0	0	0	0	0	0	0	0	0	0	0	0	0	0	0	0	0	0	0	0	0	0	0	0	0	0	0	0	0	0	0	0	0	0	0.05
Air emissions from 1 kg Acid (formic acid), average	0	0	0	0	0	0	0	0	0	0	0	0	0	0	0	0	0	0	0	0	0	0	0	0	0	0	0	0	0	0	0	0	0	0	0	0	0	0	0	0	0	0	0	0	0	0	0	0	0.05
Air emissions from 1 kg Detergent/Wetting agent, average	0	0	0	0	0	0	0	0	0	0	0	0	0	0	0	0	0	0	0	0	0	0	0	0	0	0	0	0	0	0	0	0	0	0	0	0	0	0	0	0	0	0	0	0	0	0	0	0	0.1
Air emissions from 1 kg Lubricant, average	0	0	0	0	0	0	0	0	0	0	0	0	0	0	0	0	0	0	0	0	0	0	0	0	0	0	0	0	0	0	0	0	0	0	0	0	0	0	0	0	0	0	0	0	0	0	0	0	0.02
Air emissions from 1 kg Sequestering agent, average	0	0	0	0	0	0	0	0	0	0	0	0	0	0	0	0	0	0	0	0	0	0	0	0	0	0	0	0	0	0	0	0	0	0	0	0	0	0	0	0	0	0	0	0	0	0	0	0	0.04
Alkyl ethoxylate	0	0	0	0	0	0	0	0	0	0	0	0	0	0	0	0	0	0	0	0	0	0	0	0	0	0	0	0	0	0	0	0	0	0	0	0	0	0	0	0	0	0	0	0	0	0	0	0	0
Antifoaming agent, average	0	0	0	0	0	0	0	0	0	0	0	0	0	0	0	0	0	0	0	0	0	0	0	0	0	0	0	0	0	0	0	0	0	0	0	0	0	0	0	0	0	0	0	0	0	0	0	0	0.003
Dimethyl siloxane, reaction product with silica	0	0	0	0	0	0	0	0	0.05	0	0	0	0	0	0	0	0	0	0	0	0	0	0	0	0	0	0	0	0	0	0	0	0	0	0	0	0	0	0	0	0	0	0	0	0	0	0	0	0
Sodium lauryl sulphate	0	0	0	0	0	0	0	0	0.001	0	0	0	0	0	0	0	0	0	0	0	0	0	0	0	0	0	0	0	0	0	0	0	0	0	0	0	0	0	0	0	0	0	0	0	0	0	0	0	0
Antireduction agent (H2O2), average	0	0	0	0	0	0	0	0	0	0	0	0	0	0	0	0	0	0	0	0	0	0	0	0	0	0	0	0	0	0	0	0	0	0	0	0	0	0	0	0	0	0	0	0	0	0	0	0	0
Base (alkali) (Na2CO3), average	0	0	0	0	0	0	0	0	0	0	0	0	0	0	0	0	0	0	0	0	0	0	0	0	0	0	0	0	0	0	0	0	0	0	0	0	0	0	0	0	0	0	0	0	0	0	0	0	0.01
Base (alkali) (NaOH), average	0	0	0	0	0	0	0	0	0	0	0	0	0	0	0	0	0	0	0	0	0	0	0	0	0	0	0	0	0	0	0	0	0	0	0	0	0	0	0	0	0	0	0	0	0	0	0	0	0
Black disperse dyestuff PA, BAT	0	0	0	0	0	0	0	0	0	0	0	0	0	0	0	0	0	0	0	0	0	0	0	0	0	0	0	0	0	0	0	0	0	0	0	0	0	0	0	0	0	0	0	0	0	0	0	0	0.05
Blue disperse dyestuff PA, BAT	0	0	0	0	0	0	0	0	0	0	0	0	0	0	0	0	0	0	0	0	0	0	0	0	0	0	0	0	0	0	0	0	0	0	0	0	0	0	0	0	0	0	0	0	0	0	0	0	0.0015
Business trips for retail staff	0	0	0	0	0	0	0	0	0	0	0	0	0	0	0	0	0	0	0	0	0	0	0	0	0	0	0	0	0	0	0	0	1	0	0	0	0	0	0	0	0	0	0	0	0	0	0	0	0
Buttons, jacket	0	0	0	0	0	0	0	0	0	0	0	0	0	0	0	0	0	0	0	0	0	0	0	0	0	0	0	0	0	0	0	0	0	0	0	0	0	0	0	0	0	0	0	0	0	0	0	0	0
Carding for non woven process (CN)	0	0	0	0	0	0	0	0	0	0	0	0	0	0	0	0	0	0	0	0	0	0	0	0	0	0	0	0	0	0	0	0	0	0	0	0	0	0	0	0	0	0	0	0	0	0	0	0	0
Confectioning of jacket, per kg (mix)	0	0	0	0	0	0	0	0	0	0	0	0	0	0	0	0	0	0	0	0	0	0	0	0	0	0	0	0	0	0	0	0	0	0	0	0	0	0	0	0	0	0	0	0	0	0	0	0	0
MiFuFa electricity mix	0	0	0	0	0	0	0	0	0	0	0	0	0	0	0	0	0	0	0	2.97	0	0	4.72	0.01866	0	0	0	0	0	0	0	0	0	0	0	0	0	0	0	0	4.9	1.4	0	1.25	0	0	0	0	1.32464
Cotton thread, black 50 (mix)	0	0	0	0	0	0	0	0	0	0	0	0	0	0	0	0	0	0	0	0	0	0	0	0	0	0	0	0	0	0	0	0	0	0	0	0	0	0	0	0	0	0	0	0	0	0	0	0	0
Ring spinning to yarn, CO 300 dtex, average (mix)	0	0	0	0	0	0	0	0	0	0	0	0	0	0	0	0	0	0	0	0	0	1	0	0	0	0	0	0	0	0	0	0	0	0	0	0	0	0	0	0	0	0	0	0	0	0	0	0	0
Dyeing cotton/PES weave (mix)	0	0	0	0	0	0	0	0	0	0	0	0	0	0	0	0	0	0	0	0	0	1	0	0	0	0	0	0	0	0	0	0	0	0	0	0	0	0	0	0	0	0	0	0	0	0	0	0	0
Cotton, based on Cotton Inc. data in GaBi	0	0	0	0	0	0	0	0	0	0	0	0	0	0	0	0	0	0	0	0	0	0	0	0	0	0	0	0	0	0	0	0	0	0	0	0	0	0	0	0	0	0	0	0	0	0	0	0	0
Decalcifier ((NH4)2SO4), average	0	0	0	0	0	0	0	0	0	0	0	0	0	0	0	0	0	0	0	0	0	0	0	0	0	0	0	0	0	0	0	0	0	0	0	0	0	0	0	0	0	0	0	0	0	0	0	0	0
Detergent/Wetting agent, average	0	0	0	0	0	0	0	0	0	0	0	0	0	0	0	0	0	0	0	0	0	0	0	0	0	0	0	0	0	0	0	0	0	0	0	0	0	0	0	0	0	0	0	0	0	0	0	0	0.1
Oxirane, methyl-, polymer with oxirane, decyl ether	0	0	0	0	0	0	0	0	0	0	0	0	0	0	0	0	0	0	0	0	0	0	0	0.25	0	0	0.25	0	0	0	0	0	0	0	0	0	0	0	0	0	0	0	0	0	0	0	0	0	0
Polyacrylic acid, sodium salt	0	0	0	0	0	0	0	0	0	0	0	0	0	0	0	0	0	0	0	0	0	0	0	0.1	0	0	0.1	0	0	0	0	0	0	0	0	0	0	0	0	0	0	0	0	0	0	0	0	0	0
Sodium mono(2-ethylhexyl)estersulfate	0	0	0	0	0	0	0	0	0	0	0	0	0	0	0	0	0	0	0	0	0	0	0	0.05	0	0	0.05	0	0	0	0	0	0	0	0	0	0	0	0	0	0	0	0	0	0	0	0	0	0
Detergent/Wetting agent, BAT	0	0	0	0	0	0	0	0	0	0	0	0	0	0	0	0	0	0	0	0	0	0	0	0	0	0	0	0	0	0	0	0	0	0	0	0	0	0	0	0	0	0	0	0	0	0	0	0	0
Dispergent, average	0	0	0	0	0	0	0	0	0	0	0	0	0	0	0	0	0	0	0	0	0	0	0	0	0	0	0	0	0	0	0	0	0	0	0	0	0	0	0	0	0	0	0	0	0	0	0	0	0
Distribution & Retail of jacket	0	0	0	0	0	0	0	0	0	0	0	0	0	0	0	0	0	0	0	0	0	0	0	0	0	0	0	0	0	0	0	0	0	0	0	0	0	0	0	0	0	0	0	0	0	0	0	0	0
Transport of jacket to Sweden	0	0	0	0	0	0	0	0	0	0	0	0	0	0	0	0	0	0	0	0	0	0	0	0	0	0	0	0	0	0	0	0	1	0	0	0	0	0	0	0	0	0	0	0	0	0	0	0	0
Transport of jacket within Sweden	0	0	0	0	0	0	0	0	0	0	0	0	0	0	0	0	0	0	0	0	0	0	0	0	0	0	0	0	0	0	0	0	1	0	0	0	0	0	0	0	0	0	0	0	0	0	0	0	0
Electricity in the stores and offices	0	0	0	0	0	0	0	0	0	0	0	0	0	0	0	0	0	0	0	0	0	0	0	0	0	0	0	0	0	0	0	0	1	0	0	0	0	0	0	0	0	0	0	0	0	0	0	0	0
Transport of retail staff to stores	0	0	0	0	0	0	0	0	0	0	0	0	0	0	0	0	0	0	0	0	0	0	0	0	0	0	0	0	0	0	0	0	1	0	0	0	0	0	0	0	0	0	0	0	0	0	0	0	0
Packaging for jacket - store	0	0	0	0	0	0	0	0	0	0	0	0	0	0	0	0	0	0	0	0	0	0	0	0	0	0	0	0	0	0	0	0	1	0	0	0	0	0	0	0	0	0	0	0	0	0	0	0	0
District heating MiFuFa, Swedish average	0	0	0	0	0	0	0	0	0	0	0	0	0	0	0	0	0	0	0	0	0	0	0	0	0	0	0	0	0	0	0	0	0	0	0	0	0	0	0	0	0	0	0	0	0	0	0	0	0
Heat from waste, at municipal waste incineration plant with emissions	0	0	0	0	0	0	0	0	0	0	0	0	0	0	0	0	0	0	0	0	0	0	0	0	0	0	0	0	0	0	0	0	0	0	0	0	0	0	0.2	0	0	0	0	0	0	0	0	0	0
Dry spinning of elastane to fibres (mix)	0	0	0	0	0	0	0	0	0	0	0	0	0	0	0	0	0	0	0	0	0	0	0	0	0	0	0	0	0	0	0	0	0	0	0	0	0	0	0	0	0	0	0	0	0	0	0	0	0
Drying cotton/PES in stenter frame (mix)	0	0	0	0	0	0	0	0	0	0	0	0	0	0	0	0	0	0	0	0	0	0	0	0	0	0	0	0	0	0	0	0	0	0	0	0	0	0	0	0	0	0	0	0	0	0	0	0	0
Drying of jacket, LC	0	0	0	0	0	0	0	0	0	0	0	0	0	0	0	0	0	0	0	0	0	0	0	0	0	0	0	0	0	0	0	0	0	0	0	0	0	0	0	0	0	0	0	0	0	0	0	0	0
Drying PA6 in stenter frame (mix)	0	0	0	0	0	0	0	0	0	0	0	0	0	0	0	0	0	0	0	0	0	1	0	0	0	0	0	0	0	0	0	0	0	0	0	0	0	0	0	0	0	0	0	0	0	0	0	0	0
Dummy CaF2 (low radioactice)	0	0	0	0	0	0	0	0	0	0	0	0	0	0	0	0	0	0	0	0	0	0	0	0	0	0	0	0	0	0	0	0	0	0	0	0	0	0	0	0	0	0	0	0	0	0	0	0	0
Dummy Plutonium as residual product	0	0	0	0	0	0	0	0	0	0	0	0	0	0	0	0	0	0	0	0	0	0	0	0	0	0	0	0	0	0	0	0	0	0	0	0	0	0	0	0	0	0	0	0	0	0	0	0	0
Dummy Uranium depleted	0	0	0	0	0	0	0	0	0	0	0	0	0	0	0	0	0	0	0	0	0	0	0	0	0	0	0	0	0	0	0	0	0	0	0	0	0	0	0	0	0	0	0	0	0	0	0	0	0
DWR agent, average	0	0	0	0	0	0	0	0	0	0	0	0	0	0	0	0	0	0	0	0	0	0	0	0	0	0	0	0	0	0	0	0	0	0	0	0	0	0	0	0	0	0	0	0	0	0	0	0	0.5
Dyeing and drying PA6 weave black in beam dyeing machine, average (mix)	0	0	0	0	0	0	0	0	0	0	0	0	0	0	0	0	0	0	0	0	0	0	0	0	0	0	0	0	0	0	0	0	0	0	0	0	0	0	0	0	0	0	0	0	0	0	0	0	0
Sequestering agent, average	0	0	0	0	0	0	0	0	0	0	0	0	0	0	0	0	0	0	0	0	0	0	0	0	0	0	0	0	0	0	0	0	0	0	0	0	0	0	0	0	0	0	0	0	0	0	0	0	0.04
Wetting/Penetration agent (synthetic), average	0	0	0	0	0	0	0	0	0	0	0	0	0	0	0	0	0	0	0	0	0	0	0	0	0	0	0	0	0	0	0	0	0	0	0	0	0	0	0	0	0	0	0	0	0	0	0	0	0.009
Lubricant, average	0	0	0	0	0	0	0	0	0	0	0	0	0	0	0	0	0	0	0	0	0	0	0	0	0	0	0	0	0	0	0	0	0	0	0	0	0	0	0	0	0	0	0	0	0	0	0	0	0.02
Yellow disperse dyestuff PA, BAT	0	0	0	0	0	0	0	0	0	0	0	0	0	0	0	0	0	0	0	0	0	0	0	0	0	0	0	0	0	0	0	0	0	0	0	0	0	0	0	0	0	0	0	0	0	0	0	0	0.01
Soda (CaCO3), average	0	0	0	0	0	0	0	0	0	0	0	0	0	0	0	0	0	0	0	0	0	0	0	0	0	0	0	0	0	0	0	0	0	0	0	0	0	0	0	0	0	0	0	0	0	0	0	0	0.01
Dyeing and drying PA6 weave olive in beam dyeing machine, average (mix)	0	0	0	0	0	0	0	0	0	0	0	0	0	0	0	0	0	0	0	0	0	0	0	0	0	0	0	0	0	0	0	0	0	0	0	0	0	0	0	0	0	0	0	0	0	0	0	0	0
Dyeing and drying PES weave orange in beam dyeing machine, average (mix)	0	0	0	0	0	0	0	0	0	0	0	0	0	0	0	0	0	0	0	0	0	0	0	0	0	0	0	0	0	0	0	0	0	0	0	0	0	0	0	0	0	0	0	0	0	0	0	0	0
Red disperse dyestuff PES, average	0	0	0	0	0	0	0	0	0	0	0	0	0	0	0	0	0	0	0	0	0	0	0	0	0	0	0	0	0	0	0	0	0	0	0	0	0	0	0	0	0	0	0	0	0	0	0	0	0
Reducing agent, average	0	0	0	0	0	0	0	0	0	0	0	0	0	0	0	0	0	0	0	0	0	0	0	0	0	0	0	0	0	0	0	0	0	0	0	0	0	0	0	0	0	0	0	0	0	0	0	0	0
Softener, average	0	0	0	0	0	0	0	0	0	0	0	0	0	0	0	0	0	0	0	0	0	0	0	0	0	0	0	0	0	0	0	0	0	0	0	0	0	0	0	0	0	0	0	0	0	0	0	0	0
Electricity mix Bangladesh MiFuFa	0	0	0	0	0	0	0	0	0	0	0	0	0	0	0	0	0	0	0	0	0.25641	0	0	0	0	0	0	0	0	0	0	0	0	0	0	0	0	0	0	0	0	0	0	0	0	0	0	0	0
Electricity mix Turkey MiFuFa System	0	0	0	0	0	0	0	0	0	0	0	0	0	0	0	0	0	0	0	0	0.13986	0	0	0	0	0	0	0	0	0	0	0	0	0	0	0	0	0	0	0	0	0	0	0	0	0	0	0	0
End of life jacket	0	0	0	0	0	0	0	0	0	0	0	0	0	0	0	0	0	0	0	0	0	0	0	0	0	0	0	0	0	0	0	0	0	0	0	0	0	0	0	0	0	0	0	0	0	0	0	0	0
Filament DTY yarn, synthetic 100 dtex (mix)	0	0	0	0	0	0	0	0	0	0	0	0	0	0	0	0	0	0	0	0	0	0	0	0	0	0	0	0	0	0	0	0	0	0	0	0	0	0	0	0	0	0	0	0	0	0	0	0	0
Gussets in cotton/elastane tricot (mix)	0	0	0	0	0	0	0	0	0	0	0	0	0	0	0	0	0	0	0	0	0	0	0	0	0	0	0	0	0	0	0	0	0	0	0	0	0	0	0	0	0	0	0	0	0	0	0	0	0
Knitting yarn to fabric, 5 companies	0	0	0	0	0	0	0	0	0	0	0	0	0	0	0	0	0	0	0	0	0	0	0	0	0	0	0	0	0	0	0	0	0	0	0	0	0	0	0	0	0	0	0	0	0	0	0	0	0
Ironing of jacket, LC	0	0	0	0	0	0	0	0	0	0	0	0	0	0	0	0	0	0	0	0	0	0	0	0	0	0	0	0	0	0	0	0	0	0	0	0	0	0	0	0	0	0	0	0	0	0	0	0	0
Life cycle of jacket	0	0	0	0	0	0	0	0	0	0	0	0	0	0	0	0	0	0	0	0	0	0	0	0	0	0	0	0	0	0	0	0	0	0	0	0	0	0	0	0	0	0	0	0	0	0	0	0	0
Production of jacket (mix)	0	0	0	0	0	0	0	0	0	0	0	0	0	0	0	0	0	0	0	0	0	0	0	0	0	0	0	0	0	0	0	0	0	0	0	0	0	0	0	0	0	0	0	0	0	0	0	0	0
Use of jacket, 100 days	0	0	0	0	0	0	0	0	0	0	0	0	0	0	0	0	0	0	0	0	0	0	0	0	0	0	0	0	0	0	0	0	0	0	0	0	0	0	0	0	0	0	0	0	0	0	0	0	0
Polyacrylic amide acid, sodium salt	0	0	0	0	0	0	0	0	0	0	0	0	0	0	0	0	0	0	0	0	0	0	0	0	0	0	0	0	0	0	0	0	0	0	0	0	0	0	0	0	0	0	0	0	0	0	0	0	0
Melt spinning of PA6 to fibers (mix)	0	0	0	0	0	0	0	0	0	0	0	0	0	0	0	0	0	0	0	0	0	0	0	0	0	0	0	0	0	0	0	0	0	0	0	0	0	0	0	0	0	0	0	0	0	0	0	0	0
Melt spinning of PES to fibers (mix)	0	0	0	0	0	0	0	0	0	0	0	0	0	0	0	0	0	0	0	0	0	0	0	0	0	0	0	0	0	0	0	0	0	0	0	0	0	0	0	0	0	0	0	0	0	0	0	0	0
Needlepunching for non woven process (CN)	0	0	0	0	0	0	0	0	0	0	0	0	0	0	0	0	0	0	0	0	0	0	0	0	0	0	0	0	0	0	0	0	0	0	0	0	0	0	0	0	0	0	0	0	0	0	0	0	0
Non woven process (CN)	0	0	0	0	0	0	0	0	0	0	0	0	0	0	0	0	0	0	0	0	0	0	0	0	0	0	0	0	0	0	0	0	0	0	0	0	0	0	0	0	0	0	0	0	0	0	0	0	0
Opening and blending for non woven process (CN)	0	0	0	0	0	0	0	0	0	0	0	0	0	0	0	0	0	0	0	0	0	0	0	0	0	0	0	0	0	0	0	0	0	0	0	0	0	0	0	0	0	0	0	0	0	0	0	0	0
Padding for non woven process (CN)	0	0	0	0	0	0	0	0	0	0	0	0	0	0	0	0	0	0	0	0	0	0	0	0	0	0	0	0	0	0	0	0	0	0	0	0	0	0	0	0	0	0	0	0	0	0	0	0	0
Octadecanoic acid, reaction products with diethanolamine	0	0	0	0	0	0	0	0	0	0	0	0	0	0	0	0	0	0	0	0	0	0	0	0	0	0	0	0	0	0	0	0	0	0	0	0	0	0	0	0	0	0	0	0	0	0	0	0	0
Paper labels	0	0	0	0	0	0	0	0	0	0	0	0	0	0	0	0	0	0	0	0	0	0	0	0	0	0	0	0	0	0	0	0	0	0	0	0	0	0	0	0	0	0	0	0	0	0	0	0	0
Phosphonic acid, disodium salt	0	0	0	0	0	0	0	0	0	0	0	0	0	0	0	0	0	0	0	0	0	0	0	0	0	0	0	0	0	0	0	0	0	0	0	0	0	0	0	0	0	0	0	0	0	0	0	0	0
Weave PA black (mix)	0	0	0	0	0	0	0	0	0	0	0	0	0	0	0	0	0	0	0	0	0	0	0	0	0	0	0	0	0	0	0	0	0	0	0	0	0	0	0	0	0	0	0	0	0	0	0	0	0
Weave PA olive (mix)	0	0	0	0	0	0	0	0	0	0	0	0	0	0	0	0	0	0	0	0	0	0	0	0	0	0	0	0	0	0	0	0	0	0	0	0	0	0	0	0	0	0	0	0	0	0	0	0	0
Weave orange PES (mix)	0	0	0	0	0	0	0	0	0	0	0	0	0	0	0	0	0	0	0	0	0	0	0	0	0	0	0	0	0	0	0	0	0	0	0	0	0	0	0	0	0	0	0	0	0	0	0	0	0
Non woven PES for padding for jacket (mix)	0	0	0	0	0	0	0	0	0	0	0	0	0	0	0	0	0	0	0	0	0	0	0	0	0	0	0	0	0	0	0	0	0	0	0	0	0	0	0	0	0	0	0	0	0	0	0	0	0
Zippers jacket	0	0	0	0	0	0	0	0	0	0	0	0	0	0	0	0	0	0	0	0	0	0	0	0	0	0	0	0	0	0	0	0	0	0	0	0	0	0	0	0	0	0	0	0	0	0	0	0	0
Sodium disulphite	0	0	0	0	0	0	0	0	0	0	0	0	0	0	0	0	0	0	0	0	0	0	0	0	0	0	0	0	0	0	0	0	0	0	0	0	0	0	0	0	0	0	0	0	0	0	0	0	0
Ring spinning to yarn, synthetic 100 dtex (mix)	0	0	0	0	0	0	0	0	0	0	0	0	0	0	0	0	0	0	0	0	0	0	0	0	0	0	0	0	0	0	0	0	0	0	0	0	0	0	0	0	0	0	0	0	0	0	0	0	0
Transport of customers	0	0	0	0	0	0	0	0	0	0	0	0	0	0	0	0	0	0	0	0	0	0	0	0	0	0	0	0	0	0	0	0	0	0	0	0	0	0	0	0	0	0	0	0	0	0	0	0	0
Washing of jacket, LC	0	0	0	0	0	0	0	0	0	0	0	0	0	0	0	0	0	0	0	0	0	0	0	0	0	0	0	0	0	0	0	0	0	0	0	0	0	0	0	0	0	0	0	0	0	0	0	0	0
Wearing of jacket, LC	0	0	0	0	0	0	0	0	0	0	0	0	0	0	0	0	0	0	0	0	0	0	0	0	0	0	0	0	0	0	0	0	0	0	0	0	0	0	0	0	0	0	0	0	0	0	0	0	0
Washing detergent MiFuFa	0	0	0	0	0	0	0	0	0	0	0	0	0	0	0	0	0	0	0	0	0	0	0	0	0	0	0	0	0	0	0	0	0	0	0	0	0	0	0	0	0	0	0	0	0	0	0	0	0
Waste incineration of textile fraction in municipal solid waste (MSW), EU-27 S	0	0	0	0	0	0	0	0	0	0	0	0	0	0	0	0	0	0	0	0	0	0	0	0	0	0	0	0	0	0	0	0	0	0	0	0	0	0	0	0	0	0	0	0	0	0	0	0	0
Weaving to fabric 300 dtex (mix)	0	0	0	0	0	0	0	0	0	0	0	0	0	0	0	0	0	0	0	0	0	0	0	0	0	0	0	0	0	0	0	0	0	0	0	0	0	0	0	0	0	0	0	0	0	0	0	0	0
Weaving to fabric 150 dtex (mix)	0	0	0	0	0	0	0	0	0	0	0	0	0	0	0	0	0	0	0	0	0	0	0	0	0	0	0	0	0	0	0	0	0	0	0	0	0	0	0	0	0	0	0	0	0	0	0	0	0
[truncated: 44 more columns]

## Sheet: B_mistra
	2-methyl-4-isothiazolin-3-one	5-chloro-2-methyl-4-isothiazoline-3-one	Acid (formic acid), average	Air emissions from 1 kg Acid (formic acid), average	Air emissions from 1 kg Detergent/Wetting agent, average	Air emissions from 1 kg Lubricant, average	Air emissions from 1 kg Sequestering agent, average	Alkyl ethoxylate	Antifoaming agent, average	Dimethyl siloxane, reaction product with silica	Sodium lauryl sulphate	Antireduction agent (H2O2), average	Base (alkali) (Na2CO3), average	Base (alkali) (NaOH), average	Black disperse dyestuff PA, BAT	Blue disperse dyestuff PA, BAT	Business trips for retail staff	Buttons, jacket	Carding for non woven process (CN)	Confectioning of jacket, per kg (mix)	MiFuFa electricity mix	Cotton thread, black 50 (mix)	Ring spinning to yarn, CO 300 dtex, average (mix)	Dyeing cotton/PES weave (mix)	Cotton, based on Cotton Inc. data in GaBi	Decalcifier ((NH4)2SO4), average	Detergent/Wetting agent, average	Oxirane, methyl-, polymer with oxirane, decyl ether	Polyacrylic acid, sodium salt	Sodium mono(2-ethylhexyl)estersulfate	Detergent/Wetting agent, BAT	Dispergent, average	Distribution & Retail of jacket	Transport of jacket to Sweden	Transport of jacket within Sweden	Electricity in the stores and offices	Transport of retail staff to stores	Packaging for jacket - store	District heating MiFuFa, Swedish average	Heat from waste, at municipal waste incineration plant with emissions	Dry spinning of elastane to fibres (mix)	Drying cotton/PES in stenter frame (mix)	Drying of jacket, LC	Drying PA6 in stenter frame (mix)	Dummy CaF2 (low radioactice)	Dummy Plutonium as residual product	Dummy Uranium depleted	DWR agent, average	Dyeing and drying PA6 weave black in beam dyeing machine, average (mix)
Carbon dioxide, fossil	0	0	0	0	0	0	0	0	0	0	0	0	0	0	0	0	0	0	0	0	0	0	0	0	0	0	0	0	0	0	0	0	0	0	0	0	0	0	0	0	0	0	0	0	0	0	0	0	0
Methane, fossil	0	0	0	0	0	0	0	0	0	0	0	0	0	0	0	0	0	0	0	0	0	0	0	0	0	0	0	0	0	0	0	0	0	0	0	0	0	0	0	0	0	0	0	0	0	0	0	0	0
Nitrogen oxides	0	0	0	0	0	0	0	0	0	0	0	0	0	0	0	0	0	0	0	0	0	0	0	0	0	0	0	0	0	0	0	0	0	0	0	0	0	0	0	0	0	0	0	0	0	0	0	0	0
CO2eq (Cotton Inc. data)	0	0	0	0	0	0	0	0	0	0	0	0	0	0	0	0	0	0	0	0	0	0	0	0	1.78	0	0	0	0	0	0	0	0	0	0	0	0	0	0	0	0	0	0	0	0	0	0	0	0
[truncated: 44 more columns]

## Sheet: A_u_ecoinvent
	2-methyl-4-isothiazolin-3-one	5-chloro-2-methyl-4-isothiazoline-3-one	Acid (formic acid), average	Air emissions from 1 kg Acid (formic acid), average	Air emissions from 1 kg Detergent/Wetting agent, average	Air emissions from 1 kg Lubricant, average	Air emissions from 1 kg Sequestering agent, average	Alkyl ethoxylate	Antifoaming agent, average	Dimethyl siloxane, reaction product with silica	Sodium lauryl sulphate	Antireduction agent (H2O2), average	Base (alkali) (Na2CO3), average	Base (alkali) (NaOH), average	Black disperse dyestuff PA, BAT	Blue disperse dyestuff PA, BAT	Business trips for retail staff	Buttons, jacket	Carding for non woven process (CN)	Confectioning of jacket, per kg (mix)	MiFuFa electricity mix	Cotton thread, black 50 (mix)	Ring spinning to yarn, CO 300 dtex, average (mix)	Dyeing cotton/PES weave (mix)	Cotton, based on Cotton Inc. data in GaBi	Decalcifier ((NH4)2SO4), average	Detergent/Wetting agent, average	Oxirane, methyl-, polymer with oxirane, decyl ether	Polyacrylic acid, sodium salt	Sodium mono(2-ethylhexyl)estersulfate	Detergent/Wetting agent, BAT	Dispergent, average	Distribution & Retail of jacket	Transport of jacket to Sweden	Transport of jacket within Sweden	Electricity in the stores and offices	Transport of retail staff to stores	Packaging for jacket - store	District heating MiFuFa, Swedish average	Heat from waste, at municipal waste incineration plant with emissions	Dry spinning of elastane to fibres (mix)	Drying cotton/PES in stenter frame (mix)	Drying of jacket, LC	Drying PA6 in stenter frame (mix)	Dummy CaF2 (low radioactice)	Dummy Plutonium as residual product	Dummy Uranium depleted	DWR agent, average	Dyeing and drying PA6 weave black in beam dyeing machine, average (mix)
Benzo[thia]diazole-compounds, at regional storehouse/RER S	1	1	0	0	0	0	0	0	0	0	0	0	0	0	0	0	0	0	0	0	0	0	0	0	0	0	0	0	0	0	0	0	0	0	0	0	0	0	0	0	0	0	0	0	0	0	0	0	0
Acetic acid, without water, in 98% solution state {RER}| acetic acid production, product in 98% solution state | APOS, S	0	0	0	0	0	0	0	0	0	0	0	0	0	0	0	0	0	0	0	0	0	0	0	0.052	0	0	0	0	0	0	0	0	0	0	0	0	0	0	0	0	0	0	0	0	0	0	0	0	0
Formic acid, at plant/RER S	0	0	1	0	0	0	0	0	0	0	0	0	0	0	0	0	0	0	0	0	0	0	0	0	0	0	0	0	0	0	0	0	0	0	0	0	0	0	0	0	0	0	0	0	0	0	0	0	0
Acrylic acid {RER}| production | APOS, S	0	0	0	0	0	0	0	0	0	0	0	0	0	0	0	0	0	0	0	0	0	0	0	0.006	0	0	0	0	0	0	0	0	0	0	0	0	0	0	0	0	0	0	0	0	0	0	0	0	0
Acrylic acid, at plant/RER S	0	0	0	0	0	0	0	0	0	0	0	0	0	0	0	0	0	0	0	0	0	0	0	0	0	0	0	0	1	0	0	0	0	0	0	0	0	0	0	0	0	0	0	0	0	0	0	0	0
Acrylic dispersion, without water, in 65% solution state {RER}| acrylic dispersion production, product in 65% solution state | APOS, S	0	0	0	0	0	0	0	0	0	0	0	0	0	0	0	0	0	0	0	0	0	0	0	0.008	0	0	0	0	0	0	0	0	0	0	0	0	0	0	0	0	0	0	0	0	0	0	0	0	0
Activated silica {GLO}| market for | APOS, S	0	0	0	0	0	0	0	0	0	0.1	0	0	0	0	0	0	0	0	0	0	0	0	0	0	0	0	0	0	0	0	0	0	0	0	0	0	0	0	0	0	0	0	0	0	0	0	0	0	0
Ethoxylated alcohols (AE7), petrochemical, at plant/RER S	0	0	0	0	0	0	0	1	0	0	0	0	0	0	0	0	0	0	0	0	0	0	0	0.012	0	0	0.1	0	0	1	0.2	0	0	0	0	0	0	0	0	0	0	0	0	0	0	0	0	0	0
Ethoxylated alcohol (AE7) {RER}| ethoxylated alcohol (AE7) production, petrochemical | APOS, S	0	0	0	0	0	0	0	0	0	0	0	0	0	0	0	0	0	0	0	0	0	0	0	0.012	0	0	0	0	0	0	0	0	0	0	0	0	0	0	0	0	0	0	0	0	0	0	0	0	0
Alkylbenzene sulfonate, linear, petrochemical {RER}| production | APOS, S	0	0	0	0	0	0	0	0	0	0	0	0	0	0	0	0	0	0	0	0	0	0	0	0.004	0	0	0	0	0	0	0	0	0	0	0	0	0	0	0	0	0	0	0	0	0	0	0	0	0
Ammonium sulphate, as N, at regional storehouse/RER S	0	0	0	0	0	0	0	0	0	0	0	0	0	0	0	0	0	0	0	0	0	0	0	0	0	0.210084	0	0	0	0	0	0	0	0	0	0	0	0	0	0	0	0	0	0	0	0	0	0	0
Aniline, at plant/RER S	0	0	0	0	0	0	0	0	0	0	0	0	0	0	1	1	0	0	0	0	0	0	0	0	0	0	0	0	0	0	0	0	0	0	0	0	0	0	0	0	0	0	0	0	0	0	0	0	0
Sodium hydroxide, 50% in H2O, production mix, at plant/RER S	0	0	0	0	0	0	0	0	0.02	0	0	0	0	2	0	0	0	0	0	0	0	0	0	0.024	0	0	0	0	0	0	0	0	0	0	0	0	0	0	0	0	0	0	0	0	0	0	0	0	0
Water, ultrapure, at plant/GLO S	0	0	0	0	0	0	0	0	0.94	0	0	0	0	0	0	0	0	0	0	0	0	0	0	0.5	0	0	0.5	0	0	0	0.7	0	0	0	0	0	0	0	0	0	0	0	0	0	0	0	0	0.9	0
Antimony, at refinery/CN S	0	0	0	0	0	0	0	0	0	0	0	0	0	0	0	0	0	0	0	0	0	0	0	0	0	0	0	0	0	0	0	0	0	0	0	0	0	0	0	0	0	0	0	0	0	0	0	0	0
Hydrogen peroxide, 50% in H2O, at plant/RER S	0	0	0	0	0	0	0	0	0	0	0	2	0	0	0	0	0	0	0	0	0	0	0	0	0	0	0	0	0	0	0	0	0	0	0	0	0	0	0	0	0	0	0	0	0	0	0	0	0
Sodium carbonate from ammonium chloride production, at plant/GLO S	0	0	0	0	0	0	0	0	0	0	0	0	1	0	0	0	0	0	0	0	0	0	0	0	0	0	0	0	0	0	0	0	0	0	0	0	0	0	0	0	0	0	0	0	0	0	0	0	0
Brass, at plant/CH S	0	0	0	0	0	0	0	0	0	0	0	0	0	0	0	0	0	1	0	0	0	0	0	0	0	0	0	0	0	0	0	0	0	0	0	0	0	0	0	0	0	0	0	0	0	0	0	0	0
Transport, passenger, aircraft {RER}| intercontinental | APOS, S	0	0	0	0	0	0	0	0	0	0	0	0	0	0	0	0	0.0008	0	0	0	0	0	0	0	0	0	0	0	0	0	0	0	0	0	0	0	0	0	0	0	0	0	0	0	0	0	0	0	0
Metal product manufacturing, average metal working/RER S	0	0	0	0	0	0	0	0	0	0	0	0	0	0	0	0	0	1	0	0	0	0	0	0	0	0	0	0	0	0	0	0	0	0	0	0	0	0	0	0	0	0	0	0	0	0	0	0	0
Calcium chloride, CaCl2, at plant/RER S	0	0	0	0	0	0	0	0	0	0	0	0	0	0	0	0	0	0	0	0	0	0	0	0	0	0	0	0	0	0	0	0	0	0	0	0	0	0	0	0	0	0	0	0	0	0	0	0	0
Electricity, high voltage, at grid/CN S	0	0	0	0	0	0	0	0	0	0	0	0	0	0	0	0	0	0	2.7	0	0	0	0	0	0	0	0	0	0	0	0	0	0	0	0	0	0	0	0	0	0	0	0	0	0	0	0	0	0
Chemical, organic {GLO}| production | APOS, S	0	0	0	0	0	0	0	0	0	0	0	0	0	0	0	0	0	0	0	0	0	0	0	0	0	0	0	0	0	0	0	0	0	0	0	0	0	0	0	0	0	0	0	0	0	0	0	0	0
Cobalt, at plant/GLO S	0	0	0	0	0	0	0	0	0	0	0	0	0	0	0	0	0	0	0	0	0	0	0	0	0	0	0	0	0	0	0	0	0	0	0	0	0	0	0	0	0	0	0	0	0	0	0	0	0
Compressed air, average generation, >30kW, 6 bar gauge, at compressor/RER S	0	0	0	0	0	0	0	0	0	0	0	0	0	0	0	0	0	0	0	0	0	0	0	0	0	0	0	0	0	0	0	0	0	0	0	0	0	0	0	0	0	0	0	0	0	0	0	0	0
Tap water {RoW}| market for | APOS, S	0	0	0	0	0	0	0	0	0	0	0	0	0	0	0	0	0	0	0	11.5	0	0	0	0	0	0	0	0	0	0	0	0	0	0	0	0	0	0	0	0	0	0	0	0	0	0	0	0	0
Paper, recycling, with deinking, at plant/RER S	0	0	0	0	0	0	0	0	0	0	0	0	0	0	0	0	0	0	0	0.05	0	0	0	0	0	0	0	0	0	0	0	0	0	0	0	0	0	0	0	0	0	0	0	0	0	0	0	0	0
Packaging film, LDPE, at plant/RER S	0	0	0	0	0	0	0	0	0	0	0	0	0	0	0	0	0	0	0	0.0254505	0	0	0	0	0	0	0	0	0	0	0	0	0	0	0	0	0	0	0	0	0	0	0	0	0	0	0	0	0
Solid unbleached board {GLO}| market for | APOS, S	0	0	0	0	0	0	0	0	0	0	0	0	0	0	0	0	0	0	0	0.06	0	0	0	0	0	0	0	0	0	0	0	0	0	0	0	0	0	0	0	0	0	0	0	0	0	0	0	0	0
Heat, natural gas, at boiler modulating <100kW/RER S	0	0	0	0	0	0	0	0	0	0	0	0	0	0	0	0	0	0	0	0.105	0	0	0	0	0	0	0	0	0	0	0	0	0	0	0	0	0	0	0	0	0	0	0	0	0	0	0	0	0
Waste incineration of textile fraction of industrial waste - no credits	0	0	0	0	0	0	0	0	0	0	0	0	0	0	0	0	0	0	0	0.2	0	0	0.08	0	0	0	0	0	0	0	0	0	0	0	0	0	0	0	0	0	0	0	0	0	0	0	0	0	0
Corrugated board base paper, kraftliner, at plant/RER S	0	0	0	0	0	0	0	0	0	0	0	0	0	0	0	0	0	0	0	0	0	0	0	0	0	0	0	0	0	0	0	0	0	0	0	0	0	0	0	0	0	0	0	0	0	0	0	0	0
Cotton fibre {CN}| cotton production | APOS, S	0	0	0	0	0	0	0	0	0	0	0	0	0	0	0	0	0	0	0	0	0	1.18	0	0	0	0	0	0	0	0	0	0	0	0	0	0	0	0	0	0	0	0	0	0	0	0	0	0	0
Maleic anhydride, at plant/RER S	0	0	0	0	0	0	0	0	0	0	0	0	0	0	0	0	0	0	0	0	0	0	0	0	0	0	0	0	0	0	0.1	0	0	0	0	0	0	0	0	0	0	0	0	0	0	0	0	0	0
Diethanolamine, at plant/RER S	0	0	0	0	0	0	0	0	0	0	0	0	0	0	0	0	0	0	0	0	0	0	0	0	0	0	0	0	0	0	0	0	0	0	0	0	0	0	0	0	0	0	0	0	0	0	0	0	0
Dimethylacetamide, at plant/GLO S	0	0	0	0	0	0	0	0	0	0.9	0	0	0	0	0	0	0	0	0	0	0	0	0	0	0	0	0	0	0	0	0	0	0	0	0	0	0	0	0	0	0.02	0	0	0	0	0	0	0	0
Dimethyl sulphate, at plant/RER S	0	0	0	0	0	0	0	0	0	0	1	0	0	0	0	0	0	0	0	0	0	0	0	0	0	0	0	0	0	0	0	0	0	0	0	0	0	0	0	0	0	0	0	0	0	0	0	0	0
Ethylene glycol monoethyl ether, at plant/RER S	0	0	0	0	0	0	0	0	0	0	0	0	0	0	0	0	0	0	0	0	0	0	0	0	0	0	0	0	0	0	0	1	0	0	0	0	0	0	0	0	0	0	0	0	0	0	0	0	0
Disposal, municipal solid waste, 22.9% water, to municipal incineration/CH S	0	0	0	0	0	0	0	0	0	0	0	0	0	0	0	0	0	0	0	0	0	0	0	0	0	0	0	0	0	0	0	0	0	0	0	0	0	0	0	0.315457	0	0	0	0	0	0	0	0	0
Disposal, packaging cardboard, 19.6% water, to municipal incineration/CH S	0	0	0	0	0	0	0	0	0	0	0	0	0	0	0	0	0	0	0	0	0	0	0	0	0	0	0	0	0	0	0	0	0	0	0	0	0	0	0	0	0	0	0	0	0	0	0	0	0
Disposal, packaging paper, 13.7% water, to municipal incineration/CH S	0	0	0	0	0	0	0	0	0	0	0	0	0	0	0	0	0	0	0	0	0	0	0	0	0	0	0	0	0	0	0	0	0	0	0	0	0	0	0	0	0	0	0	0	0	0	0	0	0
Disposal, plastics, mixture, 15.3% water, to municipal incineration/CH S	0	0	0	0	0	0	0	0	0	0	0	0	0	0	0	0	0	0	0	0	0	0	0	0	0	0	0	0	0	0	0	0	0	0	0	0	0	0	0	0	0	0	0	0	0	0	0	0	0
Disposal, sludge from pulp and paper production, 25% water, to sanitary landfill/CH EcoInvent System	0	0	0	0	0	0	0	0	0	0	0	0	0	0	0	0	0	0	0	0	0	0	0	0.58	0	0	0	0	0	0	0	0	0	0	0	0	0	0	0	0	0	0	0	0	0	0	0	0	0.5
Disposal, sludge from pulp and paper production, 25% water, to sanitary landfill/CH S	0	0	0	0	0	0	0	0	0	0	0	0	0	0	0	0	0	0	0	0	0	0	0	0	0	0	0	0	0	0	0	0	0	0	0	0	0	0	0	0	0	0	0	0	0	0	0	0	0
Disposal, textiles, soiled, 25% water, to municipal incineration/CH S	0	0	0	0	0	0	0	0	0	0	0	0	0	0	0	0	0	0	0	0	0	0	0	0	0	0	0	0	0	0	0	0	0	0	0	0	0	0	0	0	0	0	0	0	0	0	0	0	0
Waste incineration of fossil based textile fraction in municipal solid waste (MSW), SE	0	0	0	0	0	0	0	0	0	0	0	0	0	0	0	0	0	0	0	0	0	0	0	0	0	0	0	0	0	0	0	0	0.01	0	0	0	0	0	0	0	0	0	0	0	0	0	0	0	0
Heat, softwood chips from forest, at furnace 1000kW/CH S	0	0	0	0	0	0	0	0	0	0	0	0	0	0	0	0	0	0	0	0	0	0	0	0	0	0	0	0	0	0	0	0	0	0	0	0	0	0	0.47	0	0	0	0	0	0	0	0	0	0
Heat, light fuel oil, at boiler 100kW condensing, non-modulating/CH EcoInvent System	0	0	0	0	0	0	0	0	0	0	0	0	0	0	0	0	0	0	0	0	0	0	0	0	0	0	0	0	0	0	0	0	0	0	0	0	0	0	0.04	0	0	0	0	0	0	0	0	0	0
Heat, natural gas, at industrial furnace >100kW/RER S	0	0	0	0	0	0	0	0	0	0	0	0	0	0	0	0	0	0	0	0	0	0	0	0	0	0	0	0	0	0	0	0	0	0	0	0	0	0	0.05	0	0	0	0	0	0	0	0	0	0
Hard coal, burned in industrial furnace 1-10MW/RER S	0	0	0	0	0	0	0	0	0	0	0	0	0	0	0	0	0	0	0	0	0	0	0	0	0	0	0	0	0	0	0	0	0	0	0	0	0	0	0.05	0	0	0	0	0	0	0	0	0	0
Peat, burned in power plant/NORDEL S	0	0	0	0	0	0	0	0	0	0	0	0	0	0	0	0	0	0	0	0	0	0	0	0	0	0	0	0	0	0	0	0	0	0	0	0	0	0	0.04	0	0	0	0	0	0	0	0	0	0
Lubricating oil, at plant/RER EcoInvent System	0	0	0	0	0	0	0	0	0	0	0	0	0	0	0	0	0	0	0	0	0	0	0	0	0	0	0	0	0	0	0	0	0	0	0	0	0	0	0	0	0.06	0	0	0	0	0	0	0	0
Electricity, low voltage, at grid/SE S	0	0	0	0	0	0	0	0	0	0	0	0	0	0	0	0	0	0	0	0	0	0	0	0	0	0	0	0	0	0	0	0	0	0	0	1.92	0	0	0	0	0	0	1.50901	0	0	0	0	0	0
Tetrafluoroethylene, at plant/RER S	0	0	0	0	0	0	0	0	0	0	0	0	0	0	0	0	0	0	0	0	0	0	0	0	0	0	0	0	0	0	0	0	0	0	0	0	0	0	0	0	0	0	0	0	0	0	0	0.1	0
Heat, light fuel oil, at boiler 10kW, non-modulating/CH S	0	0	0	0	0	0	0	0	0	0	0	0	0	0	0	0	0	0	0	0	0	0	0	5.38971	0	0	0	0	0	0	0	0	0	0	0	0	0	0	0	0	0	0	0	0	0	0	0	0	1.26514
Organophosphorus-compound, unspecified {RER}| production | APOS, S	0	0	0	0	0	0	0	0	0	0	0	0	0	0	0	0	0	0	0	0	0	0	0	0.006	0	0	0	0	0	0	0	0	0	0	0	0	0	0	0	0	0	0	0	0	0	0	0	0	0
N,N-dimethylformamide {RER}| production | APOS, S	0	0	0	0	0	0	0	0	0	0	0	0	0	0	0	0	0	0	0	0	0	0	0	0.012	0	0	0	0	0	0	0	0	0	0	0	0	0	0	0	0	0	0	0	0	0	0	0	0	0
Esterquat {RER}| treatment of tallow to | APOS, S	0	0	0	0	0	0	0	0	0	0	0	0	0	0	0	0	0	0	0	0	0	0	0	0.12	0	0	0	0	0	0	0	0	0	0	0	0	0	0	0	0	0	0	0	0	0	0	0	0	0
EDTA, ethylenediaminetetraacetic acid, at plant/RER S	0	0	0	0	0	0	0	0	0	0	0	0	0	0	0	0	0	0	0	0	0	0	0	0	0	0	0	0	0	0	0	0	0	0	0	0	0	0	0	0	0	0	0	0	0	0	0	0	0
Electricity, natural gas, at power plant/UCTE S	0	0	0	0	0	0	0	0	0	0	0	0	0	0	0	0	0	0	0	0	0	0	0	0	0	0	0	0	0	0	0	0	0	0	0	0	0	0	0	0	0	0	0	0	0	0	0	0	0
Electricity, oil, at power plant/UCTE S	0	0	0	0	0	0	0	0	0	0	0	0	0	0	0	0	0	0	0	0	0	0	0	0	0	0	0	0	0	0	0	0	0	0	0	0	0	0	0	0	0	0	0	0	0	0	0	0	0
Electricity, hydropower, at power plant/PL S	0	0	0	0	0	0	0	0	0	0	0	0	0	0	0	0	0	0	0	0	0	0	0	0	0	0	0	0	0	0	0	0	0	0	0	0	0	0	0	0	0	0	0	0	0	0	0	0	0
Electricity, hard coal, at power plant/CN S	0	0	0	0	0	0	0	0	0	0	0	0	0	0	0	0	0	0	0	0	0	0	0	0	0	0	0	0	0	0	0	0	0	0	0	0	0	0	0	0	0	0	0	0	0	0	0	0	0
Electricity, high voltage, at grid/SE S	0	0	0	0	0	0	0	0	0	0	0	0	0	0	0	0	0	0	0	0	0	0	0	0	0	0	0	0	0	0	0	0	0	0	0	0	0	0	0	0	0	0	0	0	0	0	0	0	0
Electricity, medium voltage, at grid/CN S	0	0	0	0	0	0	0	0	0	0	0	0	0	0	0	0	0	0	0	0	0.65	0	0	0	0	0	0	0	0	0	0	0	0	0	0	0	0	0	0	0	0	0	0	0	0	0	0	0	0
Transport, lorry 3.5-7.5t, EURO5/RER S	0	0	0	0	0	0	0	0	0	0	0	0	0	0	0	0	0	0	0	0	0	0	0	0	0	0	0	0	0	0	0	0	0	0	0	0	0	0	0	0	0	0	0	0	0	0	0	0	0
Ethoxylated alcohols (AE11), palm oil, at plant/RER S	0	0	0	0	0	0	0	0	0	0	0	0	0	0	0	0	0	0	0	0	0	0	0	0	0	0	0	0	0	0	0	0	0	0	0	0	0	0	0	0	0	0	0	0	0	0	0	0	0
Ethoxylated alcohols (AE3), petrochemical, at plant/RER S	0	0	0	0	0	0	0	0	0	0	0	0	0	0	0	0	0	0	0	0	0	0	0	0	0	0	0	1	0	0	0	0	0	0	0	0	0	0	0	0	0	0	0	0	0	0	0	0	0
Ethoxylated alcohols, unspecified, at plant/RER S	0	0	0	0	0	0	0	0	0	0	0	0	0	0	0	0	0	0	0	0	0	0	0	0	0	0	0	0	0	0	0	0	0	0	0	0	0	0	0	0	0	0	0	0	0	0	0	0	0
Lubricating oil, at plant/RER S	0	0	0	0	0	0	0	0	0	0	0	0	0	0	0	0	0	0	0	0	0	0	0.0016	0	0	0	0	0	0	0	0	0	0	0	0	0	0	0	0	0	0	0	0	0	0	0	0	0	0
Polyurethane, flexible foam, at plant/RER S	0	0	0	0	0	0	0	0	0	0	0	0	0	0	0	0	0	0	0	0	0	0	0	0	0	0	0	0	0	0	0	0	0	0	0	0	0	0	0	0	0	0	0	0	0	0	0	0	0
Treatment, sewage, unpolluted, from residence, to wastewater treatment, class 2/CH S	0	0	0	0	0	0	0	0	0	0	0	0	0	0	0	0	0	0	0	0	0	0	0	0	0	0	0	0	0	0	0	0	0	0	0	0	0	0	0	0	0	0	0	0	0	0	0	0	0
Paraffin, at plant/RER S	0	0	0	0	0	0	0	0	0	0	0	0	0	0	0	0	0	0	0	0	0	0	0	0	0	0	0	0	0	0	0	0	0	0	0	0	0	0	0	0	0	0	0	0	0	0	0	0	0
Kraft paper, unbleached, at plant/RER S	0	0	0	0	0	0	0	0	0	0	0	0	0	0	0	0	0	0	0	0	0	0	0	0	0	0	0	0	0	0	0	0	0	0	0	0	0	0	0	0	0	0	0	0	0	0	0	0	0
Manganese, at regional storage/RER S	0	0	0	0	0	0	0	0	0	0	0	0	0	0	0	0	0	0	0	0	0	0	0	0	0	0	0	0	0	0	0	0	0	0	0	0	0	0	0	0	0	0	0	0	0	0	0	0	0
Phosphoric acid, industrial grade, 85% in H2O, at plant/RER S	0	0	0	0	0	0	0	0	0	0	0	0	0	0	0	0	0	0	0	0	0	0	0	0	0	0	0	0	0	0	0	0	0	0	0	0	0	0	0	0	0	0	0	0	0	0	0	0	0
Modified starch, at plant/RER S	0	0	0	0	0	0	0	0	0	0	0	0	0	0	0	0	0	0	0	0	0	0	0	0	0	0	0	0	0	0	0	0	0	0	0	0	0	0	0	0	0	0	0	0	0	0	0	0	0
Polyethylene terephthalate, granulate, amorphous, at plant/RER S	0	0	0	0	0	0	0	0	0	0	0	0	0	0	0	0	0	0	0	0	0	0	0	0	0	0	0	0	0	0	0	0	0	0	0	0	0	0	0	0	0	0	0	0	0	0	0	0	0
Nylon 6, at plant/RER S	0	0	0	0	0	0	0	0	0	0	0	0	0	0	0	0	0	0	0	0	0	0	0	0	0	0	0	0	0	0	0	0	0	0	0	0	0	0	0	0	0	0	0	0	0	0	0	0	0
Packaging film, low density polyethylene {GLO}| market for | APOS, S	0	0	0	0	0	0	0	0	0	0	0	0	0	0	0	0	0	0	0	0	0	0	0	0	0	0	0	0	0	0	0	0	0	0	0	0	0	0.059009	0	0	0	0	0	0	0	0	0	0	0
Polyacrylamide {GLO}| market for | APOS, S	0	0	0	0	0	0	0	0	0	0	0	0	0	0	0	0	0	0	0	0	0	0	0	0	0	0	0	0	0	0	0	0	0	0	0	0	0	0	0	0	0	0	0	0	0	0	0	0	0
Polyethylene, HDPE, granulate, at plant/RER S	0	0	0	0	0	0	0	0	0	0	0	0	0	0	0	0	0	0	0	0	0	0	0	0	0	0	0	0	0	0	0	0	0	0	0	0	0	0	0	0	0	0	0	0	0	0	0	0	0
Transport, lorry 16-32t, EURO5/RER S	0	0	0	0	0	0	0	0	0	0	0	0	0	0	0	0	0	0	0	0	0	0	0	0	0	0	0	0	0	0	0	0	0	0	2.85	0	0	0	0	0	0	0	0	0	0	0	0	0	0
Sodium dithionite, anhydrous, at plant/RER S	0	0	0	0	0	0	0	0	0	0	0	0	0	0	0	0	0	0	0	0	0	0	0	0	0	0	0	0	0	0	0	0	0	0	0	0	0	0	0	0	0	0	0	0	0	0	0	0	0
Sulphite, at plant/RER S	0	0	0	0	0	0	0	0	0	0	0	0	0	0	0	0	0	0	0	0	0	0	0	0	0	0	0	0	0	0	0	0	0	0	0	0	0	0	0	0	0	0	0	0	0	0	0	0	0
Sodium perborate, monohydrate, powder, at plant/RER S	0	0	0	0	0	0	0	0	0	0	0	0	0	0	0	0	0	0	0	0	0	0	0	0	0	0	0	0	0	0	0	0	0	0	0	0	0	0	0	0	0	0	0	0	0	0	0	0	0
Sodium perborate, tetrahydrate, powder, at plant/RER S	0	0	0	0	0	0	0	0	0	0	0	0	0	0	0	0	0	0	0	0	0	0	0	0	0	0	0	0	0	0	0	0	0	0	0	0	0	0	0	0	0	0	0	0	0	0	0	0	0
Sodium persulfate, at plant/GLO S	0	0	0	0	0	0	0	0	0	0	0	0	0	0	0	0	0	0	0	0	0	0	0	0	0	0	0	0	0	0	0	0	0	0	0	0	0	0	0	0	0	0	0	0	0	0	0	0	0
Sodium silicate, spray powder 80%, at plant/RER S	0	0	0	0	0	0	0	0	0	0	0	0	0	0	0	0	0	0	0	0	0	0	0	0	0	0	0	0	0	0	0	0	0	0	0	0	0	0	0	0	0	0	0	0	0	0	0	0	0
Steel product manufacturing, average metal working/RER S	0	0	0	0	0	0	0	0	0	0	0	0	0	0	0	0	0	0	0	0	0	0	0	0	0	0	0	0	0	0	0	0	0	0	0	0	0	0	0	0	0	0	0	0	0	0	0	0	0
Steel, low-alloyed, at plant/RER S	0	0	0	0	0	0	0	0	0	0	0	0	0	0	0	0	0	0	0	0	0	0	0	0	0	0	0	0	0	0	0	0	0	0	0	0	0	0	0	0	0	0	0	0	0	0	0	0	0
Tap water, at user/RER S	0	0	0	0	0	0	0	0	0	0	0	0	0	0	0	0	0	0	0	0	0	0	0	0	0	0	0	0	0	0	0	0	0	0	0	0	0	0	0	0	0	0	0	0	0	0	0	0	0
Transport, passenger car, medium size, petrol, EURO 5 {RoW}| transport, passenger car, medium size, petrol, EURO 5 | APOS, S	0	0	0	0	0	0	0	0	0	0	0	0	0	0	0	0	0	0	0	0	0	0	0	0	0	0	0	0	0	0	0	0	0	0	0	0	0	0	0	0	0	0	0	0	0	0	0	0	0
Transport, regular bus/CH S	0	0	0	0	0	0	0	0	0	0	0	0	0	0	0	0	0	0	0	0	0	0	0	0	0	0	0	0	0	0	0	0	0	0	0	0	0	0	0	0	0	0	0	0	0	0	0	0	0
Transport, lorry 16-32t, EURO3/RER S	0	0	0	0	0	0	0	0	0	0	0	0	0	0	0	0	0	0	0	0	0	0	0	0	0	0	0	0	0	0	0	0	0	0.18	0	0	0	0	0	0	0	0	0	0	0	0	0	0	0
Transport, transoceanic freight ship/OCE S	0	0	0	0	0	0	0	0	0	0	0	0	0	0	0	0	0	0	0	0	0	0	0	0	0	0	0	0	0	0	0	0	0	18.8	0	0	0	0	0	0	0	0	0	0	0	0	0	0	0
Transport, lorry 7.5-16t, EURO5/RER S	0	0	0	0	0	0	0	0	0	0	0	0	0	0	0	0	0	0	0	0	0	0	0	0	0	0	0	0	0	0	0	0	0	0	0.32	0	0	0	0	0	0	0	0	0	0	0	0	0	0
Transport, passenger car, medium size, petrol, EURO 5 {RER}| transport, passenger car, medium size, petrol, EURO 5 | APOS, S	0	0	0	0	0	0	0	0	0	0	0	0	0	0	0	0	0	0	0	0	0	0	0	0	0	0	0	0	0	0	0	0	0	0	0	0	0.19	0	0	0	0	0	0	0	0	0	0	0	0
Transport, regular bus {CH}| processing | APOS, S	0	0	0	0	0	0	0	0	0	0	0	0	0	0	0	0	0	0	0	0	0	0	0	0	0	0	0	0	0	0	0	0	0	0	0	0	0.1	0	0	0	0	0	0	0	0	0	0	0	0
Zeolite, powder, at plant/RER S	0	0	0	0	0	0	0	0	0	0	0	0	0	0	0	0	0	0	0	0	0	0	0	0	0	0	0	0	0	0	0	0	0	0	0	0	0	0	0	0	0	0	0	0	0	0	0	0	0
[truncated: 44 more columns]

## Sheet: LCI_ecoinvent
	Benzo[thia]diazole-compounds, at regional storehouse/RER S	Acetic acid, without water, in 98% solution state {RER}| acetic acid production, product in 98% solution state | APOS, S	Formic acid, at plant/RER S	Acrylic acid {RER}| production | APOS, S	Acrylic acid, at plant/RER S	Acrylic dispersion, without water, in 65% solution state {RER}| acrylic dispersion production, product in 65% solution state | APOS, S	Activated silica {GLO}| market for | APOS, S	Ethoxylated alcohols (AE7), petrochemical, at plant/RER S	Ethoxylated alcohol (AE7) {RER}| ethoxylated alcohol (AE7) production, petrochemical | APOS, S	Alkylbenzene sulfonate, linear, petrochemical {RER}| production | APOS, S	Ammonium sulphate, as N, at regional storehouse/RER S	Aniline, at plant/RER S	Sodium hydroxide, 50% in H2O, production mix, at plant/RER S	Water, ultrapure, at plant/GLO S	Antimony, at refinery/CN S	Hydrogen peroxide, 50% in H2O, at plant/RER S	Sodium carbonate from ammonium chloride production, at plant/GLO S	Brass, at plant/CH S	Transport, passenger, aircraft {RER}| intercontinental | APOS, S	Metal product manufacturing, average metal working/RER S	Calcium chloride, CaCl2, at plant/RER S	Electricity, high voltage, at grid/CN S	Chemical, organic {GLO}| production | APOS, S	Cobalt, at plant/GLO S	Compressed air, average generation, >30kW, 6 bar gauge, at compressor/RER S	Tap water {RoW}| market for | APOS, S	Paper, recycling, with deinking, at plant/RER S	Packaging film, LDPE, at plant/RER S	Solid unbleached board {GLO}| market for | APOS, S	Heat, natural gas, at boiler modulating <100kW/RER S	Waste incineration of textile fraction of industrial waste - no credits	Corrugated board base paper, kraftliner, at plant/RER S	Cotton fibre {CN}| cotton production | APOS, S	Maleic anhydride, at plant/RER S	Diethanolamine, at plant/RER S	Dimethylacetamide, at plant/GLO S	Dimethyl sulphate, at plant/RER S	Ethylene glycol monoethyl ether, at plant/RER S	Disposal, municipal solid waste, 22.9% water, to municipal incineration/CH S	Disposal, packaging cardboard, 19.6% water, to municipal incineration/CH S	Disposal, packaging paper, 13.7% water, to municipal incineration/CH S	Disposal, plastics, mixture, 15.3% water, to municipal incineration/CH S	Disposal, sludge from pulp and paper production, 25% water, to sanitary landfill/CH EcoInvent System	Disposal, sludge from pulp and paper production, 25% water, to sanitary landfill/CH S	Disposal, textiles, soiled, 25% water, to municipal incineration/CH S	Waste incineration of fossil based textile fraction in municipal solid waste (MSW), SE	Heat, softwood chips from forest, at furnace 1000kW/CH S	Heat, light fuel oil, at boiler 100kW condensing, non-modulating/CH EcoInvent System	Heat, natural gas, at industrial furnace >100kW/RER S
u'Methane dichloro- HCC-30' u'air'
u'Carbon dioxide fossil' u'air' u'urban air close to ground'
u'Methane fossil' u'air' u'urban air close to ground'	*due to licensing issues, the Ecoinvent GSD values associated with the LCI data for individual processes cannot be shared in this publication
u'Carbon monoxide fossil' u'air' u'urban air close to ground'
u'Ethane11-difluoro- HFC-152a'
u'Dinitrogen monoxide' u'air' u'unspecified'
u'Dinitrogen monoxide' u'air' u'non-urban air or from high stacks'
u'Carbon dioxide fossil' u'air' u'unspecified' long-term'
u'Methane fossil' u'air' u'non-urban air or from high stacks'
u'Carbon dioxide fossil' u'air' u'non-urban air or from high stacks'
u'Carbon monoxide fossil' u'air' u'non-urban air or from high stacks' u'land'
u'Methane non-fossil' u'air' u'urban air close to ground'
u'Dinitrogen monoxide' u'air' u'urban air close to ground' 'natural resource'
u'Chloroform' u'air' u'urban air close to ground'
u'Methane fossil' u'air' u'unspecified'
u'Carbon monoxide fossil' u'air' u'unspecified'
u'Methane non-fossil' u'air' u'non-urban air or from high stacks'
u'Ethane111
u'Methane trichlorofluoro- CFC-11' u'air'
u'Methane bromotrifluoro- Halon 1301' u'air' long-term'
u'Sulfur hexafluoride' u'air' u'non-urban air or from high stacks'
u'Sulfur hexafluoride' u'air' u'unspecified'
u'Methane dichlorodifluoro- CFC-12' u'air'
u'Chloroform' u'air' u'unspecified'
u'Ethane111-trichloro-
u'Methane bromo- Halon 1001' u'air'
u'Methane tetrachloro- R-10' u'air'
u'Ethane111
u'Methane non-fossil' u'air' u'unspecified'
u'Methane chlorodifluoro- HCFC-22' u'air'
u'Methane bromochlorodifluoro- Halon 1211' u'air' 'natural resource'
u'Methane tetrachloro- R-10' u'air'
u'Methane tetrafluoro- R-14' u'air' u'land'
u'Ethane hexafluoro- HFC-116' u'air'
u'Nitrogen fluoride' u'air' u'urban air close to ground' 'natural resource'
u'Sulfur hexafluoride' u'air' u'urban air close to ground'
u'Methane dichlorofluoro- HCFC-21' u'air'
u'Methane trifluoro- HFC-23' u'air'
u'Methane dichlorodifluoro- CFC-12' u'air'
u'Methane chlorodifluoro- HCFC-22' u'air'
u'Methane dichloro- HCC-30' u'air' in ground'
u'Methane dichloro- HCC-30' u'air'
u'Ethane111-trichloro-
u'Chloroform' u'air' u'non-urban air or from high stacks' u'urban air close to ground'
u'Methane monochloro- R-40' u'air'
u'Methane bromotrifluoro- Halon 1301' u'air'
u'Ethane hexafluoro- HFC-116' u'air'
u'Methane tetrafluoro- R-14' u'air' u'land'
u'Ethane111
u'Ethane11-difluoro- HFC-152a'
u'Methane chlorodifluoro- HCFC-22' u'air'
u'Methane dichlorodifluoro- CFC-12' u'air'
[truncated: 51 more columns]

## Sheet: LCI_ecoinvent_var
	Benzo[thia]diazole-compounds, at regional storehouse/RER S	Acetic acid, without water, in 98% solution state {RER}| acetic acid production, product in 98% solution state | APOS, S	Formic acid, at plant/RER S	Acrylic acid {RER}| production | APOS, S	Acrylic acid, at plant/RER S	Acrylic dispersion, without water, in 65% solution state {RER}| acrylic dispersion production, product in 65% solution state | APOS, S	Activated silica {GLO}| market for | APOS, S	Ethoxylated alcohols (AE7), petrochemical, at plant/RER S	Ethoxylated alcohol (AE7) {RER}| ethoxylated alcohol (AE7) production, petrochemical | APOS, S	Alkylbenzene sulfonate, linear, petrochemical {RER}| production | APOS, S	Ammonium sulphate, as N, at regional storehouse/RER S	Aniline, at plant/RER S	Sodium hydroxide, 50% in H2O, production mix, at plant/RER S	Water, ultrapure, at plant/GLO S	Antimony, at refinery/CN S	Hydrogen peroxide, 50% in H2O, at plant/RER S	Sodium carbonate from ammonium chloride production, at plant/GLO S	Brass, at plant/CH S	Transport, passenger, aircraft {RER}| intercontinental | APOS, S	Metal product manufacturing, average metal working/RER S	Calcium chloride, CaCl2, at plant/RER S	Electricity, high voltage, at grid/CN S	Chemical, organic {GLO}| production | APOS, S	Cobalt, at plant/GLO S	Compressed air, average generation, >30kW, 6 bar gauge, at compressor/RER S	Tap water {RoW}| market for | APOS, S	Paper, recycling, with deinking, at plant/RER S	Packaging film, LDPE, at plant/RER S	Solid unbleached board {GLO}| market for | APOS, S	Heat, natural gas, at boiler modulating <100kW/RER S	Waste incineration of textile fraction of industrial waste - no credits	Corrugated board base paper, kraftliner, at plant/RER S	Cotton fibre {CN}| cotton production | APOS, S	Maleic anhydride, at plant/RER S	Diethanolamine, at plant/RER S	Dimethylacetamide, at plant/GLO S	Dimethyl sulphate, at plant/RER S	Ethylene glycol monoethyl ether, at plant/RER S	Disposal, municipal solid waste, 22.9% water, to municipal incineration/CH S	Disposal, packaging cardboard, 19.6% water, to municipal incineration/CH S	Disposal, packaging paper, 13.7% water, to municipal incineration/CH S	Disposal, plastics, mixture, 15.3% water, to municipal incineration/CH S	Disposal, sludge from pulp and paper production, 25% water, to sanitary landfill/CH EcoInvent System	Disposal, sludge from pulp and paper production, 25% water, to sanitary landfill/CH S	Disposal, textiles, soiled, 25% water, to municipal incineration/CH S	Waste incineration of fossil based textile fraction in municipal solid waste (MSW), SE	Heat, softwood chips from forest, at furnace 1000kW/CH S	Heat, light fuel oil, at boiler 100kW condensing, non-modulating/CH EcoInvent System	Heat, natural gas, at industrial furnace >100kW/RER S
u'Methane dichloro- HCC-30' u'air'
u'Carbon dioxide fossil' u'air' u'urban air close to ground'
u'Methane fossil' u'air' u'urban air close to ground'	*due to licensing issues, the Ecoinvent GSD values associated with the LCI data for individual processes cannot be shared in this publication
u'Carbon monoxide fossil' u'air' u'urban air close to ground'
u'Ethane11-difluoro- HFC-152a'
u'Dinitrogen monoxide' u'air' u'unspecified'
u'Dinitrogen monoxide' u'air' u'non-urban air or from high stacks'
u'Carbon dioxide fossil' u'air' u'unspecified' long-term'
u'Methane fossil' u'air' u'non-urban air or from high stacks'
u'Carbon dioxide fossil' u'air' u'non-urban air or from high stacks'
u'Carbon monoxide fossil' u'air' u'non-urban air or from high stacks' u'land'
u'Methane non-fossil' u'air' u'urban air close to ground'
u'Dinitrogen monoxide' u'air' u'urban air close to ground' 'natural resource'
u'Chloroform' u'air' u'urban air close to ground'
u'Methane fossil' u'air' u'unspecified'
u'Carbon monoxide fossil' u'air' u'unspecified'
u'Methane non-fossil' u'air' u'non-urban air or from high stacks'
u'Ethane111
u'Methane trichlorofluoro- CFC-11' u'air'
u'Methane bromotrifluoro- Halon 1301' u'air' long-term'
u'Sulfur hexafluoride' u'air' u'non-urban air or from high stacks'
u'Sulfur hexafluoride' u'air' u'unspecified'
u'Methane dichlorodifluoro- CFC-12' u'air'
u'Chloroform' u'air' u'unspecified'
u'Ethane111-trichloro-
u'Methane bromo- Halon 1001' u'air'
u'Methane tetrachloro- R-10' u'air'
u'Ethane111
u'Methane non-fossil' u'air' u'unspecified'
u'Methane chlorodifluoro- HCFC-22' u'air'
u'Methane bromochlorodifluoro- Halon 1211' u'air' 'natural resource'
u'Methane tetrachloro- R-10' u'air'
u'Methane tetrafluoro- R-14' u'air' u'land'
u'Ethane hexafluoro- HFC-116' u'air'
u'Nitrogen fluoride' u'air' u'urban air close to ground' 'natural resource'
u'Sulfur hexafluoride' u'air' u'urban air close to ground'
u'Methane dichlorofluoro- HCFC-21' u'air'
u'Methane trifluoro- HFC-23' u'air'
u'Methane dichlorodifluoro- CFC-12' u'air'
u'Methane chlorodifluoro- HCFC-22' u'air'
u'Methane dichloro- HCC-30' u'air' in ground'
u'Methane dichloro- HCC-30' u'air'
u'Ethane111-trichloro-
u'Chloroform' u'air' u'non-urban air or from high stacks' u'urban air close to ground'
u'Methane monochloro- R-40' u'air'
u'Methane bromotrifluoro- Halon 1301' u'air'
u'Ethane hexafluoro- HFC-116' u'air'
u'Methane tetrafluoro- R-14' u'air' u'land'
u'Ethane111
u'Ethane11-difluoro- HFC-152a'
u'Methane chlorodifluoro- HCFC-22' u'air'
u'Methane dichlorodifluoro- CFC-12' u'air'
[truncated: 51 more columns]

## Sheet: Cu_IO
CEDA sector index	Sector Name	2-methyl-4-isothiazolin-3-one	5-chloro-2-methyl-4-isothiazoline-3-one	Acid (formic acid), average	Air emissions from 1 kg Acid (formic acid), average	Air emissions from 1 kg Detergent/Wetting agent, average	Air emissions from 1 kg Lubricant, average	Air emissions from 1 kg Sequestering agent, average	Alkyl ethoxylate	Antifoaming agent, average	Dimethyl siloxane, reaction product with silica	Sodium lauryl sulphate	Antireduction agent (H2O2), average	Base (alkali) (Na2CO3), average	Base (alkali) (NaOH), average	Black disperse dyestuff PA, BAT	Blue disperse dyestuff PA, BAT	Business trips for retail staff	Buttons, jacket	Carding for non woven process (CN)	Confectioning of jacket, per kg (mix)	MiFuFa electricity mix	Cotton thread, black 50 (mix)	Ring spinning to yarn, CO 300 dtex, average (mix)	Dyeing cotton/PES weave (mix)	Cotton, based on Cotton Inc. data in GaBi	Decalcifier ((NH4)2SO4), average	Detergent/Wetting agent, average	Oxirane, methyl-, polymer with oxirane, decyl ether	Polyacrylic acid, sodium salt	Sodium mono(2-ethylhexyl)estersulfate	Detergent/Wetting agent, BAT	Dispergent, average	Distribution & Retail of jacket	Transport of jacket to Sweden	Transport of jacket within Sweden	Electricity in the stores and offices	Transport of retail staff to stores	Packaging for jacket - store	District heating MiFuFa, Swedish average	Heat from waste, at municipal waste incineration plant with emissions	Dry spinning of elastane to fibres (mix)	Drying cotton/PES in stenter frame (mix)	Drying of jacket, LC	Drying PA6 in stenter frame (mix)	Dummy CaF2 (low radioactice)	Dummy Plutonium as residual product	Dummy Uranium depleted	DWR agent, average
230301	Nonresidential maintenance and repair	0	0	0	0	0	0	0	0	0	0	0	0	0	0	0	0	0	0	0	0	0	0	0	0	0	0	0	0	0	0	0	0	0	0	0	0	0	0	0	0	0	0	0	0	0	0	0	0
233230	Manufacturing structures	0	0	0	0	0	0	0	0	0	0	0	0	0	0	0	0	0	0	0	0	0	0	0	0	0	0	0	0	0	0	0	0	0	0	0	0	0	0	0	0	0	0	0	0	0	0	0	0
327200	Glass and glass product manufacturing	0	0	0	0	0	0	0	0	0	0	0	0	0	0	0	0	0	0	0	0	0	0	0	0	0	0	0	0	0	0	0	0	0	0	0	0	0	0	0	0	0	0	0	0	0	0	0	0
332710	Machine shops	0	0	0	0	0	0	0	0	0	0	0	0	0	0	0	0	0	0	0	0	0	0	0	0	0	0	0	0	0	0	0	0	0	0	0	0	0	0	0	0	0	0	0	0	0	0	0	0
334413	Semiconductor and related device manufacturing	0	0	0	0	0	0	0	0	0	0	0	0	0	0	0	0	0	0	0	0	0	0	0	0	0	0	0	0	0	0	0	0	0	0	0	0	0	0	0	0	0	0	0	0	0	0	0	0
339990	All other miscellaneous manufacturing	0	0	0	0	0	0	0	0	0	0	0	0	0	0	0	0	0	0	0	0	0	0	0	0	0	0	0	0	0	0	0	0	0	0	0	0	0	0	0	0	0	0	0	0	0	0	0	0
493000	Warehousing and storage	0	0	0	0	0	0	0	0	0	0	0	0	0	0	0	0	0	0	0	0	0	0	0	0	0	0	0	0	0	0	0	0	0	0	0	0	0	0	0	0	0	0	0	0	0	0	0	0
517110	Wired telecommunications carriers	0	0	0	0	0	0	0	0	0	0	0	0	0	0	0	0	0	0	0	0	0	0	0	0	0	0	0	0	0	0	0	0	0	0	0	0	0	0	0	0	0	0	0	0	0	0	0	0
518200	Data processing, hosting, and related services	0	0	0	0	0	0	0	0	0	0	0	0	0	0	0	0	0	0	0	0	0	0	0	0	0	0	0	0	0	0	0	0	0	0	0	0	0	0	0	0	0	0	0	0	0	0	0	0
524100	Insurance carriers	0	0	0	0	0	0	0	0	0	0	0	0	0	0	0	0	0	0	0	0	0	0	0	0	0	0	0	0	0	0	0	0	0	0	0	0	0	0	0	0	0	0	0	0	0	0	0	0
533000	Lessors of nonfinancial intangible assets	0	0	0	0	0	0	0	0	0	0	0	0	0	0	0	0	0	0	0	0	0	0	0	0	0	0	0	0	0	0	0	0	0	0	0	0	0	0	0	0	0	0	0	0	0	0	0	0
541100	Legal services	0	0	0	0	0	0	0	0	0	0	0	0	0	0	0	0	0	0	0	0	0	0	0	0	0	0	0	0	0	0	0	0	0	0	0	0	0	0	0	0	0	0	0	0	0	0	0	0
541200	Accounting, tax preparation, bookkeeping, and payroll services	0	0	0	0	0	0	0	0	0	0	0	0	0	0	0	0	0	0	0	0	0	0	0	0	0	0	0	0	0	0	0	0	0	0	0	0	0	0	0	0	0	0	0	0	0	0	0	0
541300	Architectural, engineering, and related services	0	0	0	0	0	0	0	0	0	0	0	0	0	0	0	0	0	0	0	0	0	0	0	0	0	0	0	0	0	0	0	0	0	0	0	0	0	0	0	0	0	0	0	0	0	0	0	0
541511	Custom computer programming services	0	0	0	0	0	0	0	0	0	0	0	0	0	0	0	0	0	0	0	0	0	0	0	0	0	0	0	0	0	0	0	0	0	0	0	0	0	0	0	0	0	0	0	0	0	0	0	0
541800	Advertising, public relations, and related services	0	0	0	0	0	0	0	0	0	0	0	0	0	0	0	0	0	0	0	0	0	0	0	0	0	0	0	0	0	0	0	0	0	0	0	0	0	0	0	0	0	0	0	0	0	0	0	0
550000	Management of companies and enterprises	0	0	0	0	0	0	0	0	0	0	0	0	0	0	0	0	0	0	0	0	0	0	0	0	0	0	0	0	0	0	0	0	0	0	0	0	0	0	0	0	0	0	0	0	0	0	0	0
561300	Employment services	0	0	0	0	0	0	0	0	0	0	0	0	0	0	0	0	0	0	0	0	0	0	0	0	0	0	0	0	0	0	0	0	0	0	0	0	0	0	0	0	0	0	0	0	0	0	0	0
561400	Business support services	0	0	0	0	0	0	0	0	0	0	0	0	0	0	0	0	0	0	0	0	0	0	0	0	0	0	0	0	0	0	0	0	0	0	0	0	0	0	0	0	0	0	0	0	0	0	0	0
561700	Services to buildings and dwellings	0	0	0	0	0	0	0	0	0	0	0	0	0	0	0	0	0	0	0	0	0	0	0	0	0	0	0	0	0	0	0	0	0	0	0	0	0	0	0	0	0	0	0	0	0	0	0	0
561900	Other support services	0	0	0	0	0	0	0	0	0	0	0	0	0	0	0	0	0	0	0	0	0	0	0	0	0	0	0	0	0	0	0	0	0	0	0	0	0	0	0	0	0	0	0	0	0	0	0	0
2332A0	Commercial structures, including farm structures	0	0	0	0	0	0	0	0	0	0	0	0	0	0	0	0	0	0	0	0	0	0	0	0	0	0	0	0	0	0	0	0	0	0	0	0	0	0	0	0	0	0	0	0	0	0	0	0
33299B	Other fabricated metal manufacturing	0	0	0	0	0	0	0	0	0	0	0	0	0	0	0	0	0	0	0	0	0	0	0	0	0	0	0	0	0	0	0	0	0	0	0	0	0	0	0	0	0	0	0	0	0	0	0	0
33329A	Other industrial machinery manufacturing	0	0	0	0	0	0	0	0	0	0	0	0	0	0	0	0	0	0	0	0	0	0	0	0	0	0	0	0	0	0	0	0	0	0	0	0	0	0	0	0	0	0	0	0	0	0	0	0
522A00	Nondepository credit intermediation and related activities	0	0	0	0	0	0	0	0	0	0	0	0	0	0	0	0	0	0	0	0	0	0	0	0	0	0	0	0	0	0	0	0	0	0	0	0	0	0	0	0	0	0	0	0	0	0	0	0
52A000	Monetary authorities and depository credit intermediation	0	0	0	0	0	0	0	0	0	0	0	0	0	0	0	0	0	0	0	0	0	0	0	0	0	0	0	0	0	0	0	0	0	0	0	0	0	0	0	0	0	0	0	0	0	0	0	0
531ORE	Other real estate	0	0	0	0	0	0	0	0	0	0	0	0	0	0	0	0	0	0	0	0	0	0	0	0	0	0	0	0	0	0	0	0	0	0	0	0	0	0	0	0	0	0	0	0	0	0	0	0
5419A0	Marketing research and all other miscellaneous professional, scientific, and technical services	0	0	0	0	0	0	0	0	0	0	0	0	0	0	0	0	0	0	0	0	0	0	0	0	0	0	0	0	0	0	0	0	0	0	0	0	0	0	0	0	0	0	0	0	0	0	0	0
S00300	Noncomparable imports	0	0	0	0	0	0	0	0	0	0	0	0	0	0	0	0	0	0	0	0	0	0	0	0	0	0	0	0	0	0	0	0	0	0	0	0	0	0	0	0	0	0	0	0	0	0	0	0
811300	Commercial and industrial machinery and equipment repair and maintenance	0	0	0	0	0	0	0	0	0	0	0	0	0	0	0	0	0	0	0	0	0	0	0	0	0	0	0	0	0	0	0	0	0	0	0	0	0	0	0	0	0	0	0	0	0	0	0	0
541400	Specialized design services	0	0	0	0	0	0	0	0	0	0	0	0	0	0	0	0	0	0	0	0	0	0	0	0	0	0	0	0	0	0	0	0	0	0	0	0	0	0	0	0	0	0	0	0	0	0	0	0
561600	Investigation and security services	0	0	0	0	0	0	0	0	0	0	0	0	0	0	0	0	0	0	0	0	0	0	0	0	0	0	0	0	0	0	0	0	0	0	0	0	0	0	0	0	0	0	0	0	0	0	0	0
333993	Packaging machinery manufacturing	0	0	0	0	0	0	0	0	0	0	0	0	0	0	0	0	0	0	0	0	0	0	0	0	0	0	0	0	0	0	0	0	0	0	0	0	0	0	0	0	0	0	0	0	0	0	0	0
336112	Light truck and utility vehicle manufacturing	0	0	0	0	0	0	0	0	0	0	0	0	0	0	0	0	0	0	0	0	0	0	0	0	0	0	0	0	0	0	0	0	0	0	0	0	0	0	0	0	0	0	0	0	0	0	0	0
333920	Material handling equipment manufacturing	0	0	0	0	0	0	0	0	0	0	0	0	0	0	0	0	0	0	0	0	0	0	0	0	0	0	0	0	0	0	0	0	0	0	0	0	0	0	0	0	0	0	0	0	0	0	0	0
334418	Printed circuit assembly (electronic assembly) manufacturing	0	0	0	0	0	0	0	0	0	0	0	0	0	0	0	0	0	0	0	0	0	0	0	0	0	0	0	0	0	0	0	0	0	0	0	0	0	0	0	0	0	0	0	0	0	0	0	0
[truncated: 45 more columns]

## Sheet: Cu_IO_var
CEDA sector index	Sector Name	2-methyl-4-isothiazolin-3-one	5-chloro-2-methyl-4-isothiazoline-3-one	Acid (formic acid), average	Air emissions from 1 kg Acid (formic acid), average	Air emissions from 1 kg Detergent/Wetting agent, average	Air emissions from 1 kg Lubricant, average	Air emissions from 1 kg Sequestering agent, average	Alkyl ethoxylate	Antifoaming agent, average	Dimethyl siloxane, reaction product with silica	Sodium lauryl sulphate	Antireduction agent (H2O2), average	Base (alkali) (Na2CO3), average	Base (alkali) (NaOH), average	Black disperse dyestuff PA, BAT	Blue disperse dyestuff PA, BAT	Business trips for retail staff	Buttons, jacket	Carding for non woven process (CN)	Confectioning of jacket, per kg (mix)	MiFuFa electricity mix	Cotton thread, black 50 (mix)	Ring spinning to yarn, CO 300 dtex, average (mix)	Dyeing cotton/PES weave (mix)	Cotton, based on Cotton Inc. data in GaBi	Decalcifier ((NH4)2SO4), average	Detergent/Wetting agent, average	Oxirane, methyl-, polymer with oxirane, decyl ether	Polyacrylic acid, sodium salt	Sodium mono(2-ethylhexyl)estersulfate	Detergent/Wetting agent, BAT	Dispergent, average	Distribution & Retail of jacket	Transport of jacket to Sweden	Transport of jacket within Sweden	Electricity in the stores and offices	Transport of retail staff to stores	Packaging for jacket - store	District heating MiFuFa, Swedish average	Heat from waste, at municipal waste incineration plant with emissions	Dry spinning of elastane to fibres (mix)	Drying cotton/PES in stenter frame (mix)	Drying of jacket, LC	Drying PA6 in stenter frame (mix)	Dummy CaF2 (low radioactice)	Dummy Plutonium as residual product	Dummy Uranium depleted	DWR agent, average
230301	Nonresidential maintenance and repair	0	0	0	0	0	0	0	0	0	0	0	0	0	0	0	0	0	0	0	0	0	0	0	0	0	0	0	0	0	0	0	0	0	0	0	0	0	0	0	0	0	0	0	0	0	0	0	0
233230	Manufacturing structures	0	0	0	0	0	0	0	0	0	0	0	0	0	0	0	0	0	0	0	0	0	0	0	0	0	0	0	0	0	0	0	0	0	0	0	0	0	0	0	0	0	0	0	0	0	0	0	0
327200	Glass and glass product manufacturing	0	0	0	0	0	0	0	0	0	0	0	0	0	0	0	0	0	0	0	0	0	0	0	0	0	0	0	0	0	0	0	0	0	0	0	0	0	0	0	0	0	0	0	0	0	0	0	0
332710	Machine shops	0	0	0	0	0	0	0	0	0	0	0	0	0	0	0	0	0	0	0	0	0	0	0	0	0	0	0	0	0	0	0	0	0	0	0	0	0	0	0	0	0	0	0	0	0	0	0	0
334413	Semiconductor and related device manufacturing	0	0	0	0	0	0	0	0	0	0	0	0	0	0	0	0	0	0	0	0	0	0	0	0	0	0	0	0	0	0	0	0	0	0	0	0	0	0	0	0	0	0	0	0	0	0	0	0
339990	All other miscellaneous manufacturing	0	0	0	0	0	0	0	0	0	0	0	0	0	0	0	0	0	0	0	0	0	0	0	0	0	0	0	0	0	0	0	0	0	0	0	0	0	0	0	0	0	0	0	0	0	0	0	0
493000	Warehousing and storage	0	0	0	0	0	0	0	0	0	0	0	0	0	0	0	0	0	0	0	0	0	0	0	0	0	0	0	0	0	0	0	0	0	0	0	0	0	0	0	0	0	0	0	0	0	0	0	0
517110	Wired telecommunications carriers	0	0	0	0	0	0	0	0	0	0	0	0	0	0	0	0	0	0	0	0	0	0	0	0	0	0	0	0	0	0	0	0	0	0	0	0	0	0	0	0	0	0	0	0	0	0	0	0
518200	Data processing, hosting, and related services	0	0	0	0	0	0	0	0	0	0	0	0	0	0	0	0	0	0	0	0	0	0	0	0	0	0	0	0	0	0	0	0	0	0	0	0	0	0	0	0	0	0	0	0	0	0	0	0
524100	Insurance carriers	0	0	0	0	0	0	0	0	0	0	0	0	0	0	0	0	0	0	0	0	0	0	0	0	0	0	0	0	0	0	0	0	0	0	0	0	0	0	0	0	0	0	0	0	0	0	0	0
533000	Lessors of nonfinancial intangible assets	0	0	0	0	0	0	0	0	0	0	0	0	0	0	0	0	0	0	0	0	0	0	0	0	0	0	0	0	0	0	0	0	0	0	0	0	0	0	0	0	0	0	0	0	0	0	0	0
541100	Legal services	0	0	0	0	0	0	0	0	0	0	0	0	0	0	0	0	0	0	0	0	0	0	0	0	0	0	0	0	0	0	0	0	0	0	0	0	0	0	0	0	0	0	0	0	0	0	0	0
541200	Accounting, tax preparation, bookkeeping, and payroll services	0	0	0	0	0	0	0	0	0	0	0	0	0	0	0	0	0	0	0	0	0	0	0	0	0	0	0	0	0	0	0	0	0	0	0	0	0	0	0	0	0	0	0	0	0	0	0	0
541300	Architectural, engineering, and related services	0	0	0	0	0	0	0	0	0	0	0	0	0	0	0	0	0	0	0	0	0	0	0	0	0	0	0	0	0	0	0	0	0	0	0	0	0	0	0	0	0	0	0	0	0	0	0	0
541511	Custom computer programming services	0	0	0	0	0	0	0	0	0	0	0	0	0	0	0	0	0	0	0	0	0	0	0	0	0	0	0	0	0	0	0	0	0	0	0	0	0	0	0	0	0	0	0	0	0	0	0	0
541800	Advertising, public relations, and related services	0	0	0	0	0	0	0	0	0	0	0	0	0	0	0	0	0	0	0	0	0	0	0	0	0	0	0	0	0	0	0	0	0	0	0	0	0	0	0	0	0	0	0	0	0	0	0	0
550000	Management of companies and enterprises	0	0	0	0	0	0	0	0	0	0	0	0	0	0	0	0	0	0	0	0	0	0	0	0	0	0	0	0	0	0	0	0	0	0	0	0	0	0	0	0	0	0	0	0	0	0	0	0
561300	Employment services	0	0	0	0	0	0	0	0	0	0	0	0	0	0	0	0	0	0	0	0	0	0	0	0	0	0	0	0	0	0	0	0	0	0	0	0	0	0	0	0	0	0	0	0	0	0	0	0
561400	Business support services	0	0	0	0	0	0	0	0	0	0	0	0	0	0	0	0	0	0	0	0	0	0	0	0	0	0	0	0	0	0	0	0	0	0	0	0	0	0	0	0	0	0	0	0	0	0	0	0
561700	Services to buildings and dwellings	0	0	0	0	0	0	0	0	0	0	0	0	0	0	0	0	0	0	0	0	0	0	0	0	0	0	0	0	0	0	0	0	0	0	0	0	0	0	0	0	0	0	0	0	0	0	0	0
561900	Other support services	0	0	0	0	0	0	0	0	0	0	0	0	0	0	0	0	0	0	0	0	0	0	0	0	0	0	0	0	0	0	0	0	0	0	0	0	0	0	0	0	0	0	0	0	0	0	0	0
2332A0	Commercial structures, including farm structures	0	0	0	0	0	0	0	0	0	0	0	0	0	0	0	0	0	0	0	0	0	0	0	0	0	0	0	0	0	0	0	0	0	0	0	0	0	0	0	0	0	0	0	0	0	0	0	0
33299B	Other fabricated metal manufacturing	0	0	0	0	0	0	0	0	0	0	0	0	0	0	0	0	0	0	0	0	0	0	0	0	0	0	0	0	0	0	0	0	0	0	0	0	0	0	0	0	0	0	0	0	0	0	0	0
33329A	Other industrial machinery manufacturing	0	0	0	0	0	0	0	0	0	0	0	0	0	0	0	0	0	0	0	0	0	0	0	0	0	0	0	0	0	0	0	0	0	0	0	0	0	0	0	0	0	0	0	0	0	0	0	0
522A00	Nondepository credit intermediation and related activities	0	0	0	0	0	0	0	0	0	0	0	0	0	0	0	0	0	0	0	0	0	0	0	0	0	0	0	0	0	0	0	0	0	0	0	0	0	0	0	0	0	0	0	0	0	0	0	0
52A000	Monetary authorities and depository credit intermediation	0	0	0	0	0	0	0	0	0	0	0	0	0	0	0	0	0	0	0	0	0	0	0	0	0	0	0	0	0	0	0	0	0	0	0	0	0	0	0	0	0	0	0	0	0	0	0	0
531ORE	Other real estate	0	0	0	0	0	0	0	0	0	0	0	0	0	0	0	0	0	0	0	0	0	0	0	0	0	0	0	0	0	0	0	0	0	0	0	0	0	0	0	0	0	0	0	0	0	0	0	0
5419A0	Marketing research and all other miscellaneous professional, scientific, and technical services	0	0	0	0	0	0	0	0	0	0	0	0	0	0	0	0	0	0	0	0	0	0	0	0	0	0	0	0	0	0	0	0	0	0	0	0	0	0	0	0	0	0	0	0	0	0	0	0
S00300	Noncomparable imports	0	0	0	0	0	0	0	0	0	0	0	0	0	0	0	0	0	0	0	0	0	0	0	0	0	0	0	0	0	0	0	0	0	0	0	0	0	0	0	0	0	0	0	0	0	0	0	0
811300	Commercial and industrial machinery and equipment repair and maintenance	0	0	0	0	0	0	0	0	0	0	0	0	0	0	0	0	0	0	0	0	0	0	0	0	0	0	0	0	0	0	0	0	0	0	0	0	0	0	0	0	0	0	0	0	0	0	0	0
541400	Specialized design services	0	0	0	0	0	0	0	0	0	0	0	0	0	0	0	0	0	0	0	0	0	0	0	0	0	0	0	0	0	0	0	0	0	0	0	0	0	0	0	0	0	0	0	0	0	0	0	0
561600	Investigation and security services	0	0	0	0	0	0	0	0	0	0	0	0	0	0	0	0	0	0	0	0	0	0	0	0	0	0	0	0	0	0	0	0	0	0	0	0	0	0	0	0	0	0	0	0	0	0	0	0
333993	Packaging machinery manufacturing	0	0	0	0	0	0	0	0	0	0	0	0	0	0	0	0	0	0	0	0	0	0	0	0	0	0	0	0	0	0	0	0	0	0	0	0	0	0	0	0	0	0	0	0	0	0	0	0
336112	Light truck and utility vehicle manufacturing	0	0	0	0	0	0	0	0	0	0	0	0	0	0	0	0	0	0	0	0	0	0	0	0	0	0	0	0	0	0	0	0	0	0	0	0	0	0	0	0	0	0	0	0	0	0	0	0
333920	Material handling equipment manufacturing	0	0	0	0	0	0	0	0	0	0	0	0	0	0	0	0	0	0	0	0	0	0	0	0	0	0	0	0	0	0	0	0	0	0	0	0	0	0	0	0	0	0	0	0	0	0	0	0
334418	Printed circuit assembly (electronic assembly) manufacturing	0	0	0	0	0	0	0	0	0	0	0	0	0	0	0	0	0	0	0	0	0	0	0	0	0	0	0	0	0	0	0	0	0	0	0	0	0	0	0	0	0	0	0	0	0	0	0	0
[truncated: 45 more columns]

## Sheet: CxLCI_CEDA
			Nonresidential maintenance and repair	Manufacturing structures	Glass and glass product manufacturing	Machine shops	Semiconductor and related device manufacturing	All other miscellaneous manufacturing	Warehousing and storage	Wired telecommunications carriers	Data processing, hosting, and related services	Insurance carriers	Lessors of nonfinancial intangible assets	Legal services	Accounting, tax preparation, bookkeeping, and payroll services	Architectural, engineering, and related services	Custom computer programming services	Advertising, public relations, and related services	Management of companies and enterprises	Employment services	Business support services	Services to buildings and dwellings	Other support services	Commercial structures, including farm structures	Other fabricated metal manufacturing	Other industrial machinery manufacturing	Nondepository credit intermediation and related activities	Monetary authorities and depository credit intermediation	Other real estate	Marketing research and all other miscellaneous professional, scientific, and technical services	Noncomparable imports	Commercial and industrial machinery and equipment repair and maintenance	Specialized design services	Investigation and security services	Packaging machinery manufacturing	Light truck and utility vehicle manufacturing	Material handling equipment manufacturing	Printed circuit assembly (electronic assembly) manufacturing
Method	Impact Category	Unit	230301	233230	327200	332710	334413	339990	493000	517110	518200	524100	533000	541100	541200	541300	541511	541800	550000	561300	561400	561700	561900	2332A0	33299B	33329A	522A00	52A000	531ORE	5419A0	S00300	811300	541400	561600	333993	336112	333920	334418
TRACI	Global Warming	kg CO2 eq
			*due to licensing issues, the CEDA characterized LCI data for individual processes cannot be shared in this publication

## Sheet: CxLCI_CEDA_var
			Nonresidential maintenance and repair	Manufacturing structures	Glass and glass product manufacturing	Machine shops	Semiconductor and related device manufacturing	All other miscellaneous manufacturing	Warehousing and storage	Wired telecommunications carriers	Data processing, hosting, and related services	Insurance carriers	Lessors of nonfinancial intangible assets	Legal services	Accounting, tax preparation, bookkeeping, and payroll services	Architectural, engineering, and related services	Custom computer programming services	Advertising, public relations, and related services	Management of companies and enterprises	Employment services	Business support services	Services to buildings and dwellings	Other support services	Commercial structures, including farm structures	Other fabricated metal manufacturing	Other industrial machinery manufacturing	Nondepository credit intermediation and related activities	Monetary authorities and depository credit intermediation	Other real estate	Marketing research and all other miscellaneous professional, scientific, and technical services	Noncomparable imports	Commercial and industrial machinery and equipment repair and maintenance	Specialized design services	Investigation and security services	Packaging machinery manufacturing	Light truck and utility vehicle manufacturing	Material handling equipment manufacturing	Printed circuit assembly (electronic assembly) manufacturing
Method	Impact Category	Unit	230301	233230	327200	332710	334413	339990	493000	517110	518200	524100	533000	541100	541200	541300	541511	541800	550000	561300	561400	561700	561900	2332A0	33299B	33329A	522A00	52A000	531ORE	5419A0	S00300	811300	541400	561600	333993	336112	333920	334418
TRACI	Global Warming	kg CO2 eq
			*due to licensing issues, the GSDs associated with the CEDA characterized LCI data for individual processes cannot be shared in this publication

[truncated: 5 more sheets: A, Avar, B, C, Y]
